RESEARCH ARTICLE

# Host Immune Responses Differ between *M. africanum*- and *M. tuberculosis*-Infected Patients following Standard Anti-tuberculosis Treatment

Leopold D. Tientcheu<sup>1,2,3\*</sup>, Mariëlle C. Haks<sup>4</sup>, Schadrac C. Agbla<sup>1,5</sup>, Jayne S. Sutherland<sup>1</sup>, Ifedayo M. Adetifa<sup>6,7</sup>, Simon Donkor<sup>1</sup>, Edwin Quinten<sup>4</sup>, Mohammed Daramy<sup>1</sup>, Martin Antonio<sup>1,8,9</sup>, Beate Kampmann<sup>1</sup>, Tom H. M. Ottenhoff<sup>4</sup>, Hazel M. Dockrell<sup>2</sup>, Martin O. Ota<sup>1,10</sup>

**1** Vaccines and Immunity Theme, Medical Research Council Unit, The Gambia, Banjul, The Gambia, **2** Department of Immunology and Infection, Faculty of Infectious and Tropical Diseases, London School of Hygiene and Tropical Medicine, London, United Kingdom, **3** Department of Biochemistry, Faculty of Science, University of Yaoundé 1, Yaoundé, Cameroon, **4** Department of Infectious Diseases, Leiden University Medical Center, Leiden, The Netherlands, **5** Department of Medical Statistics, Faculty of Epidemiology and Population Health, London School of Hygiene and Tropical Medicine, London, United Kingdom, **6** Disease Control and Elimination Theme, Medical Research Council Unit, The Gambia, Fajara, The Gambia, **7** Department of Infectious Diseases Epidemiology, Faculty of Epidemiology and Population Health, London School of Hygiene and Tropical Medicine, London, United Kingdom, **8** Department of Pathogen Molecular Biology, Faculty of Infectious and Tropical Diseases, London School of Hygiene & Tropical Medicine, London, United Kingdom, **9** Microbiology and Infection Unit, Warwick Medical School, University of Warwick, Coventry, United Kingdom, **10** World Health Organization Regional Office for Africa, Brazzaville, Congo

\* [ltientcheu@mrc.gm](mailto:ltientcheu@mrc.gm); [tientcheuleo@gmail.com](mailto:tientcheuleo@gmail.com)

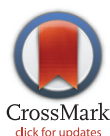

**OPEN ACCESS**

**Citation:** Tientcheu LD, Haks MC, Agbla SC, Sutherland JS, Adetifa IM, Donkor S, et al. (2016) Host Immune Responses Differ between *M. africanum*- and *M. tuberculosis*-Infected Patients following Standard Anti-tuberculosis Treatment. PLoS Negl Trop Dis 10(5): e0004701. doi:10.1371/journal.pntd.0004701

**Editor:** Pamela L. C. Small, University of Tennessee, UNITED STATES

**Received:** January 21, 2016

**Accepted:** April 19, 2016

**Published:** May 18, 2016

**Copyright:** © 2016 Tientcheu et al. This is an open access article distributed under the terms of the [Creative Commons Attribution License](https://creativecommons.org/licenses/by/4.0/), which permits unrestricted use, distribution, and reproduction in any medium, provided the original author and source are credited.

**Data Availability Statement:** Our data are from study patients and are sensitive to disclosure therefore cannot be made publicly available according to the MRC/LSHTM ethic policy. However, the anonymised data is available to share upon request to the MRC Unit the Gambia under the supervision of the Head of Data Management and Archives Mr. Bai Lamin Dondeh who is not an author on our manuscript. To have the data, please email our e-data repository ([edatarepository@mrc.gm](mailto:edatarepository@mrc.gm)), which is widely accessible by our data management

## Abstract

Epidemiological differences exist between *Mycobacterium africanum* (*Maf*)- and *Mycobacterium tuberculosis* (*Mtb*)-infected patients, but to date, contributing host factors have not been characterised. We analysed clinical outcomes, as well as soluble markers and gene expression profiles in unstimulated, and ESAT6/CFP-10-, whole-*Maf*- and *Mtb*-stimulated blood samples of 26 *Maf*- and 49 *Mtb*-HIV-negative tuberculosis patients before, and after 2 and 6 months of anti-tuberculosis therapy. Before treatment, both groups had similar clinical parameters, but differed in few cytokines concentration and gene expression profiles. Following treatment the body mass index, skinfold thickness and chest X-ray scores showed greater improvement in the *Mtb*- compared to *Maf*-infected patients, after adjusting for age, sex and ethnicity ( $p = 0.02$ ; 0.04 and 0.007, respectively). In addition, in unstimulated blood, IL-12p70, *IL12A* and *TLR9* were significantly higher in *Maf*-infected patients, while IL-15, IL-8 and MIP-1 $\alpha$  were higher in *Mtb*-infected patients. Overnight stimulation with ESAT-6/CFP-10 induced significantly higher levels of IFN- $\gamma$  and TNF- $\alpha$  production, as well as gene expression of *CCL4*, *IL1B* and *TLR4* in *Mtb*- compared to *Maf*-infected patients. Our study confirms differences in clinical features and immune genes expression and concentration of proteins associated with inflammatory processes between *Mtb*- and *Maf*-infected patients

and archives staffs who will rapidly reply to any request.

**Funding:** The study was funded by the MRC Unit, The Gambia as a PhD fellowship awarded to LDT. Financial support for these studies was obtained from projects EC FP7 IDEA, EC FP7 ADITEC, EC FP7 NEWTBVAC and EC HOR2020 TBVAC2020. The funders had no role in study design, data collection and analysis, decision to publish, or preparation of the manuscript.

**Competing Interests:** The authors have declared that no competing interests exist.

following anti-tuberculosis treatment These findings have public health implications for treatment regimens, and biomarkers for tuberculosis diagnosis and susceptibility.

## Author Summary

In the Gambia tuberculosis is caused by two major lineages within the *Mycobacterium tuberculosis* complex (MTBC), *M. tuberculosis* lineages 4 and *M. africanum* lineage 6. Our analysis of 26 *M. africanum*- and 49 *M. tuberculosis* -HIV-negative tuberculosis patients' clinic parameters and antigen-stimulated blood cytokines concentration and genes expression reveal that heterogeneous response to standard anti-tuberculosis treatment might depend on the diversity of MTBC lineages. Before treatment, the two groups of patients had similar clinical parameters, but greater improvement was observed in *M. tuberculosis*-compared to *M. africanum* -infected patients post-treatment. This was supported by higher production of inflammation-associated cytokines and genes in unstimulated blood samples from *M. africanum*-infected patients compared to those infected with *M. tuberculosis*, who instead had higher level of disease resolution cytokines. In contrast, there were lower cytokine responses in antigen-stimulated blood samples of *M. africanum*- compared to *M. tuberculosis*-infected patients post-treatment indicating a poorly recovered immune profile. Our results suggest that *M. africanum* patients respond relatively poorly to the standard anti-tuberculosis treatment or might have a pre-existing defective immune profile; this could explain why they succumb to less virulent mycobacteria.

## Introduction

*Mycobacterium africanum* (*Maf*) is an ancient lineage of the *Mycobacterium tuberculosis* (*Mtb*) Complex (MTBC), mostly found in West Africa where it causes up to half of all tuberculosis (TB) cases [1]. Apart from descriptions of the epidemiological differences between *Maf* and *Mtb* infection in the human population, differences in underlying immune responses, clinical course and outcome of TB therapy have not been described [2]. Other authors have recently attempted to define biomarkers that are able to predict treatment outcome and if validated, these biomarkers could significantly shorten trials of new TB regimens [3–5]. Ultimately, the performance of such biomarkers might be influenced by the infecting mycobacterial lineage. Previous studies that have assessed whether the rate of response to treatment differs between infecting MTBC lineages obtained conflicting results [6–13], but data from our own laboratory and others [6,12,13] indicate that their responses to treatment are heterogeneous. Different MTBC lineages may have been responsible for the heterogeneous response to the shorter TB treatment regimen containing Gatifloxacin recently tested in West Africa [14].

We have previously shown that although the proportion of activated T cells were similar in *Maf*- and *Mtb*-infected patients pre-treatment, they decreased significantly in *Mtb*-infected patients, while those of *Maf*-infected patients were persistently high but consisted of poorly functional T cells post-treatment [15]. In addition, the transcriptomic and metabolic profiles of *Maf*- and *Mtb*-infected patients while similar at baseline significantly differed by lineage post-treatment mainly due to changes in *Mtb*-infected but not in *Maf*-infected patients [13]. These results suggest that intrinsic host factors determine the immune response to TB and/or differential effect of the standard anti-TB treatment on the two lineages.

This study was conducted to investigate the changes in the host immune response and clinical outcomes following treatment in a larger cohort of *Maf*- and *Mtb*-infected tuberculosis

patients before, during and after standard anti-TB treatment. Although we found no differences in the clinical parameters measured and found differences in only few cytokines concentration and gene expression profiles between *Maf*- and *Mtb*-infected patients pre-treatment, many of these showed significant differences post-treatment suggesting either intrinsic lineage-specific difference in response to standard anti-TB therapy and/or in the underlying host immunity.

## Methods

### Ethics statement

Ethical approval was obtained from The Joint Gambian Government/Medical Research Council (MRC) Ethics Committee in The Gambia and the London School of Hygiene & Tropical Medicine Ethics Committee. All patients provided written informed consent.

### Study participants

Sputum smear and culture positive TB patients were recruited at the TB Clinic, MRC Unit, Fajara, The Gambia. On recruitment, we recorded clinical symptoms using a questionnaire that included duration of cough, weight lost, night sweats, and fever; routine clinical assessment including anthropometry (weight, height, skinfold thickness (SFK) and body mass index (BMI)), and tuberculin skin test (TST), as previously reported [16]. Sputum was sent for TB smear and culture. The genotypes of the infecting bacilli in sputum were determined by spoligotyping analysis and assessing the presence or absence of lineage defining Large Sequence Polymorphisms (LSP) RD702 and TbD1 as previously described [15,17]. All patients were HIV-negative with no history of previous TB disease and were enrolled before anti-TB treatment. All patients received conventional therapy of 2 months intensive treatment with Isoniazid, Rifampicin, Pyrazinamide, Ethambutol, followed by a second phase of four months with only Isoniazid and Rifampicin (2HRZE/4HR) [18]. They were actively followed-up at 2 and 6 months of treatment, during which chest x-ray (CXR), haematological and sputum smear examination, and anthropometric measurements were done, and heparinized blood samples collected. All patients were confirmed sputum smear negative at the end of the 6 months treatment.

### Whole blood stimulation and multiplex cytokine assays

Undiluted whole blood (180  $\mu$ L) was incubated overnight (16 hours) in duplicate with 20  $\mu$ L of medium alone or phytohaemagglutinin (PHA-L, Sigma-Aldrich, UK; 5  $\mu$ g/ml), purified protein derivative (*Mtb*-PPD; Statens Serum Institute, Denmark; 10  $\mu$ g/ml), ESAT-6/CFP-10 peptides pool [(EC, ProImmune, UK; 2.5  $\mu$ g/mL/peptides), EC amino acid sequence is identical in *Maf* and *Mtb* lineages [19], or whole mycobacteria *Mtb* H37Rv and *Maf* GM041182 used both live [final multiplicity of infection (MOI) 1:2 (bacteria: monocytes) and heat-killed ( $6 \times 10^5$  cfu/mL)] [15].

After overnight culture, supernatants were collected from each well, TriReagent (Ambion, Foster City, USA) was added to the pellet, and both were stored at  $-20^{\circ}\text{C}$  till analysis. The supernatants were analysed using a Bio-Plex Pro 27-plex kit (cat# M500KCAFOY, BIO-RAD Laboratories; Belgium) for IL-1 $\beta$ , IL-1RA, IL-2, IL-4, IL-5, IL-6, IL-7, IL-8 (CXCL8), IL-9, IL-10, IL-12p70, IL-13, IL-15, IL-17A, Eotaxin (CCL11), Basic FGF, granulocyte colony-stimulating factor [G-CSF], granulocyte-macrophage CSF [GM-CSF], IFN- $\gamma$ , IP-10 (CXCL10), MCP-1 (CCL2), MIP-1 $\alpha$  (CCL3), MIP-1 $\beta$  (CCL4), PDGF- $\beta\beta$ , RANTES (CCL5), TNF- $\alpha$ , and VEGF following the standard protocol provided by the manufacturers. Plates were immediately read

on the Bio-Plex reader using Bio-Plex Manager software (version 4.1.1; Bio-Rad, USA) with five-parameter logistic (5-PL) algorithms and a low PMT setting. All standards were run in duplicate. OOR $>$  and OOR $<$  values were assigned the highest and lowest standard values multiplied or divided by 2 respectively.

### RNA extraction and dual colour Reverse Transcription Multiplex Ligation-dependent Probe Amplification (dcRT-MLPA)

RNA was isolated from stimulated blood pellets lysed in TriReagent (Ambion, Foster City, USA) using a Chloroform/RNeasy (Qiagen, Crawley, UK) protocol following manufacturer's instructions. Dual colour RT-MLPA was performed as described previously [20,21]. Briefly, 100–150 ng RNA was reverse transcribed using 80nM of target-specific RT primers, 1x MMLV reverse transcriptase and 0.4 mM of each dNTP. cDNA was denatured and hybridized overnight at 60°C with 4 nM of probe mix containing left- and right-hand probes of 85 genes. After ligating the hybridized probes with ligase-65 for 15 min at 54°C, PCR amplification of the ligation products was performed with specific SALSA FAM-labelled MLPA primers, HEX-labelled MAPH primers (1  $\mu$ L of 2  $\mu$ M each, forward primer 5'-GGCCGCGGGAATTCGATT-3' and reverse primer 5'-GCCGCGAATTCAGTAGTG-3'), 14.75  $\mu$ L H<sub>2</sub>O and 0.25  $\mu$ L SALSA polymerase. Primers and probes were from Sigma-Aldrich Chemie (Zwijndrecht, The Netherlands) and MLPA SALSA reagents from MRC-Holland (Amsterdam, The Netherlands). Thermal cycling conditions were 33 cycles of 30s at 95°C, 30s at 58°C and 60s at 72°C, followed by 1 cycle of 20min at 72°C. PCR products were diluted 1:10 in HiDi formamide containing 400 HD ROX size standard and analysed on an Applied Biosystems 3730 capillary sequencer in GeneScan mode (Applied Biosystems, Foster City, USA).

Data were analysed using GeneMapper 4.0 software package (Applied Biosystems, Warrington, UK) and peak areas were exported to a Microsoft Excel file for downstream analysis. Data were subsequently normalized to GAPDH housekeeping gene and signals below the threshold value for noise cut-off (peak area #200) were assigned threshold value for noise cut-off. A positive control that encompassed the complement reverse sequence of the combined target-specific sequences of the left and right hand half-probes was used for all runs.

### Statistical analysis

Demographic and clinical characteristics were compared between *Maf*- and *Mtb*-infected patients using Mann-Whitney test for continuous variables and Fisher's exact test for categorical variables. BMI, skinfold thickness and haematology parameters were logarithmically transformed. No transformation was needed for the chest X-ray score [16], and all were analysed using a random intercept model based on restricted maximum likelihood (REML) estimation.

The cytokine responses were positively skewed and contained zero as values. We first added a constant 0.5 to all cytokine responses as suggested by Yamamura [22], then used a base-2 logarithmic transformation to reduce skewness. Three-level random-intercept model (time points nested in cytokines nested in patients) was fitted to account for the dependence of the cytokine responses within subject and between time points. The model included triple interaction terms between cytokines, lineages, stimulants and time points to estimate the difference in infecting lineages effect on cytokine production in blood incubated with medium alone, as well as the incremental difference in infecting lineages effect induced by each stimulant at each treatment time points. This approach did not require any background subtraction. Contrast analysis was used to estimate differences in infecting lineages effect on cytokine production with Sidak multiple comparison correction [23].

Gene expression data were available for each subject at the same time points as for the cytokines. At each time point, the effect of the four culture conditions (Medium, ESAT-6/CFP-10, live *Maf* and live *Mtb*) on the expression of 85 selected immune-related genes were assessed. Thirty (30) genes showed expression data above the cut-off value (200) for  $\leq 1\%$  of the patients and were discarded from the analysis to avoid inflation of the cut-off value. The remaining 55 genes were log<sub>2</sub> transformed and analysed as described for cytokines' data.

Predicted values of clinical outcomes, cytokines production and genes expression from the constructed model were used to study kinetics following anti-TB treatment for each group and plotted using R software. We tested for interaction between lineages and treatment time points using the Wald test. All analyses were adjusted for age, gender and ethnicity and performed using STATA 12.1 (StataCorp, USA). Statistical significance was considered at p-value  $\leq 0.05$ .

## Results

### Study participants

Seventy-five HIV-negative TB patients were enrolled in this study, 26 were infected with *Maf*-lineage 6 and 49 with *Mtb*-lineage 4. Before treatment, *Maf*- and *Mtb*-infected patients had similar clinical symptoms, age, sex, ethnicity, sputum smear microscopy grade and TST results (Table 1). The BMI, skinfold thickness and CXR scores were also similar in both groups at enrolment, but following treatment these were more significantly improved in *Mtb*- compared to *Maf*-infected patients post-treatment after adjusting for age, sex and ethnic group ( $p = 0.02$ ,  $p = 0.04$  and  $p = 0.007$  respectively; Table 1). The BMI and CXR scores were significantly affected by the infecting lineages following treatment (interaction  $p = 0.006$  and  $p = 0.02$  respectively; Fig 1). Mean corpuscular volume (MCV) was significantly higher in *Mtb*- compared to *Maf*-infected patients before and post-treatment after adjusting for the mentioned potential confounders ( $p = 0.02$  and  $p = 0.03$ ; respectively), while all other measured haematology parameters were similar between the groups (Table 1). The monocytes/lymphocytes (M:L) ratio was similar before treatment but higher in *Maf*- compared to *Mtb*-infected patients post-treatment after adjusting for confounders ( $p = 0.05$  respectively; Table 1).

### *Maf*- and *Mtb*-infected patients' cytokine response to stimulants differs after treatment

Before treatment, only stimulation with ESAT-6/CFP-10 induced a significant difference and this was seen only for RANTES (CCL5) production, which was higher in *Maf*- compared to *Mtb*-infected patients ( $p = 0.03$ ; Fig 2; S1 Table). In contrast, many cytokines showed significantly different responses between *Mtb*- and *Maf*-infected patients post-treatment. In unstimulated blood supernatants, concentrations of IL-8 ( $p = 0.013$ ), IL-15 ( $p = 0.01$ ) and MIP-1 $\alpha$  ( $p = 0.027$ ) were significantly higher in *Mtb*- compared to *Maf*-infected patients (Fig 2; S2 Table), whereas IL-12p70 ( $p = 0.002$ ) and PDGF- $\beta$  ( $p = 0.097$ ) were higher in *Maf*- compared to *Mtb*-infected patients. Stimulation with ESAT-6/CFP-10 induced the greatest differences in cytokines production between the two groups. IFN- $\gamma$  ( $p = 0.022$ ), TNF- $\alpha$  ( $p = 0.042$ ), IL-2 ( $p = 0.093$ ), IL-1ra ( $p = 0.093$ ), and GM-CSF ( $p = 0.096$ ) were higher in *Mtb*- compared to *Maf*-infected patients after Sidak multiple comparisons correction (Fig 2; S2 Table).

### Kinetics of specific cytokines production following treatment of *Mtb*- and *Maf*-infected patients

The kinetics of differentially produced cytokines between the groups was assessed in order to understand the effect of treatment on cytokine responses in each group. In the unstimulated



Table 1. Demographic, clinical and haematology characteristics of *M. africanum* and *M. tuberculosis* patients.

|                                                    | <i>M. africanum</i> |                  | <i>M. tuberculosis</i> |                  | Unadjusted            |              | Adjusted             |              |
|----------------------------------------------------|---------------------|------------------|------------------------|------------------|-----------------------|--------------|----------------------|--------------|
|                                                    | n                   | Positive         | n                      | Positive         | ED (95%CI)            | P            | AED (95%CI)          | P            |
| Number of cases at enrolment <sup>a</sup>          | 26                  | (35)             | 49                     | (65)             |                       |              |                      |              |
| Age in years, median (range)                       | 26                  | 30.5 (19–66)     | 49                     | 27 (15–79)       |                       | 0.39         |                      |              |
| Sex (%) (Female)                                   | 26                  | 8 (27)           | 49                     | 20 (38)          |                       | 0.40         |                      |              |
| Ethnicity (%)                                      | 26                  |                  | 49                     |                  |                       | 0.50         |                      |              |
| Mandinka                                           |                     | 8 (27)           |                        | 23 (43)          |                       |              |                      |              |
| Jola                                               |                     | 10 (33)          |                        | 5 (9)            |                       | 0.084        |                      |              |
| Fula                                               |                     | 4 (13)           |                        | 10 (19)          |                       | 0.89         |                      |              |
| Wolof                                              |                     | 3 (10)           |                        | 6 (12)           |                       | 0.79         |                      |              |
| Other                                              |                     | 5 (17)           |                        | 9 (17)           |                       | 0.89         |                      |              |
| Maximum smear grade (%)                            | 26                  |                  | 49                     |                  |                       | 0.18         |                      |              |
| 1+                                                 |                     | 5 (19)           |                        | 3 (6)            |                       |              |                      |              |
| 2+                                                 |                     | 6 (23)           |                        | 18 (37)          |                       | 0.066        |                      |              |
| 3+                                                 |                     | 15 (58)          |                        | 28 (57)          |                       | 0.16         |                      |              |
| TST                                                | 13                  | 12 (92)          | 28                     | 24 (89)          |                       | 0.40         |                      |              |
| <b>BMI, median (range)</b>                         |                     |                  |                        |                  |                       |              |                      |              |
| Enrolment                                          | 26                  | 18.6 (13–22)     | 49                     | 18.6 (13–32)     | 0.04 (-0.04,0.12)     | 0.28         | 0.04 (-0.05,0.13)    | 0.39         |
| 6 months                                           | 14                  | 18.6 (17–21)     | 25                     | 20.2 (17–36)     | 0.12 (0.04,0.2)       | <b>0.004</b> | 0.11 (0.02,0.20)     | <b>0.02</b>  |
| <b>Skinfold thickness median (range) in mm</b>     |                     |                  |                        |                  |                       |              |                      |              |
| Enrolment                                          | 26                  | 8 (3–20)         | 49                     | 8 (3–20)         | 0.08 (-0.08,0.25)     | 0.33         | 0.03 (-0.17,0.23)    | 0.76         |
| 6 months                                           | 14                  | 8.5 (3–20)       | 27                     | 14 (2–25)        | 0.2 (0.07,0.4)        | <b>0.006</b> | 0.28 (-0.01,0.55)    | <b>0.04</b>  |
| <b>Chest X-Ray (Moderate &amp; Severe Disease)</b> |                     |                  |                        |                  |                       |              |                      |              |
| Enrolment                                          | 26                  | 21 (81)          | 48                     | 44 (92)          | 0.009 (-0.2,0.3)      | 0.94         | 0.05 (-0.25,0.35)    | 0.74         |
| 6 months                                           | 11                  | 7 (64)           | 18                     | 2 (11)           | -0.55 (-0.8, -0.3)    | <b>0.000</b> | -0.55 (-0.95, -0.15) | <b>0.007</b> |
| <b>Haematology parameter median (range)</b>        |                     |                  |                        |                  |                       |              |                      |              |
| <b>Haemoglobin (mg/dL)</b> Enrolment               | 26                  | 11.5 (8.7–14.6)  | 43                     | 10.7 (7.5–14.2)  | -0.06 (0.13, -0.03)   | 0.06         | -0.06 (-0.12, 0.01)  | 0.09         |
| 6 months                                           | 20                  | 13.4 (11.5–16.8) | 30                     | 13.7 (11.3–23.1) | 0.01 (-0.06, 0.08)    | 0.80         | 0.01 (-0.06, 0.08)   | 0.74         |
| <b>WBC (x10<sup>9</sup>/L)</b> Enrolment           | 26                  | 7.2 (3.8–19.4)   | 43                     | 7.6 (3.6–15.3)   | 0.1 (-0.06, 0.26)     | 0.20         | 0.10 (-0.07, 0.26)   | 0.24         |
| 6 months                                           | 20                  | 5.2 (3.2–7.8)    | 30                     | 4.9 (2.4–8.4)    | -0.04 (-0.23, 0.14)   | 0.63         | -0.05 (-0.24, 0.13)  | 0.56         |
| <b>Granulocytes (x10<sup>9</sup>/L)</b> Enrolment  | 26                  | 4.3 (1.2–15.8)   | 43                     | 5.5 (1.4–11.4)   | 0.21 (-0.07, 0.49)    | 0.13         | 0.19 (-0.10, 0.47)   | 0.20         |
| 6 months                                           | 20                  | 3 (0.9–13.1)     | 30                     | 3.4 (1.4–5.7)    | -0.02 (-0.33, 0.29)   | 0.89         | -0.03 (-0.34, 0.29)  | 0.87         |
| <b>Lymphocytes (x10<sup>9</sup>/L)</b> Enrolment   | 26                  | 1.5 (0.3–8.1)    | 43                     | 1.7 (0.6–4.2)    | 0.08 (-0.16, 0.33)    | 0.50         | 0.09 (-0.17, 0.34)   | 0.50         |
| 6 months                                           | 20                  | 2.8 (0.8–6.3)    | 30                     | 3.7 (1.6–8.6)    | 0.03 (-0.25, 0.32)    | 0.82         | 0.02 (-0.28, 0.31)   | 0.91         |
| <b>Monocytes (x10<sup>9</sup>/L)</b> Enrolment     | 26                  | 0.5 (0.3–1.4)    | 43                     | 0.5 (0.1–1.2)    | 0.008 (-0.20, 0.21)   | 0.93         | -0.004 (-0.22, 0.21) | 0.97         |
| 6 months                                           | 20                  | 0.7 (0.3–1.4)    | 30                     | 0.6 (0.3–1.4)    | -0.20 (-0.43, 0.04)   | 0.1          | -0.21 (-0.45, 0.03)  | 0.08         |
| <b>M:L ratio</b> Enrolment                         | 26                  | 0.31 (0.12–1.14) | 43                     | 0.29 (0.06–0.87) | -0.06 (-0.30, 0.18)   | 0.64         | -0.06 (-0.30, 0.19)  | 0.65         |
| 6 months                                           | 20                  | 0.23 (0.11–0.62) | 30                     | 0.18 (0.08–0.45) | -0.27 (-0.55, -0.001) | <b>0.049</b> | -0.27 (-0.54, 0.005) | <b>0.05</b>  |
| <b>MCV (fL)</b> Enrolment                          | 25                  | 77.8(59.2–92.5)  | 42                     | 79.6 (60.6–92.9) | 0.02 (-0.02, 0.07)    | 0.29         | 0.05 (0.004, 0.09)   | <b>0.03</b>  |
| 6 months                                           | 20                  | 83.7 (67.6–94.8) | 30                     | 85.1 (69.3–97.9) | 0.04 (-0.01, 0.08)    | 0.15         | 0.06 (0.01, 0.10)    | <b>0.02</b>  |
| <b>Platelets (x10<sup>9</sup>/L)</b> Enrolment     | 26                  | 376 (131–678)    | 43                     | 410 (101–663)    | 0.09 (-0.08, 0.26)    | 0.30         | 0.09 (-0.09, 0.26)   | 0.33         |
| 6 months                                           | 20                  | 238 (161–355)    | 30                     | 230 (74–387)     | -0.06 (-0.25, 0.13)   | 0.51         | -0.07 (-0.26, 0.13)  | 0.50         |

<sup>a</sup> Total number of patients recruited = 75.

Abbreviations: BMI, body mass index; CXR, chest X-ray; 1+, 2+ & 3+ = Density of Mycobacteria into patient sputum; TST: tuberculin skin test, *Maf* = *M. africanum*; *Mtb* = *M. tuberculosis*; WBC = white blood cells, MCV = mean corpuscular volume, M:L: monocytes/lymphocytes ratio, ED = Estimated Difference between *Mtb* vs. *Maf*-infected patients, AED = Adjusted ED.

Significant p-values are highlighted in bold.

doi:10.1371/journal.pntd.0004701.t001

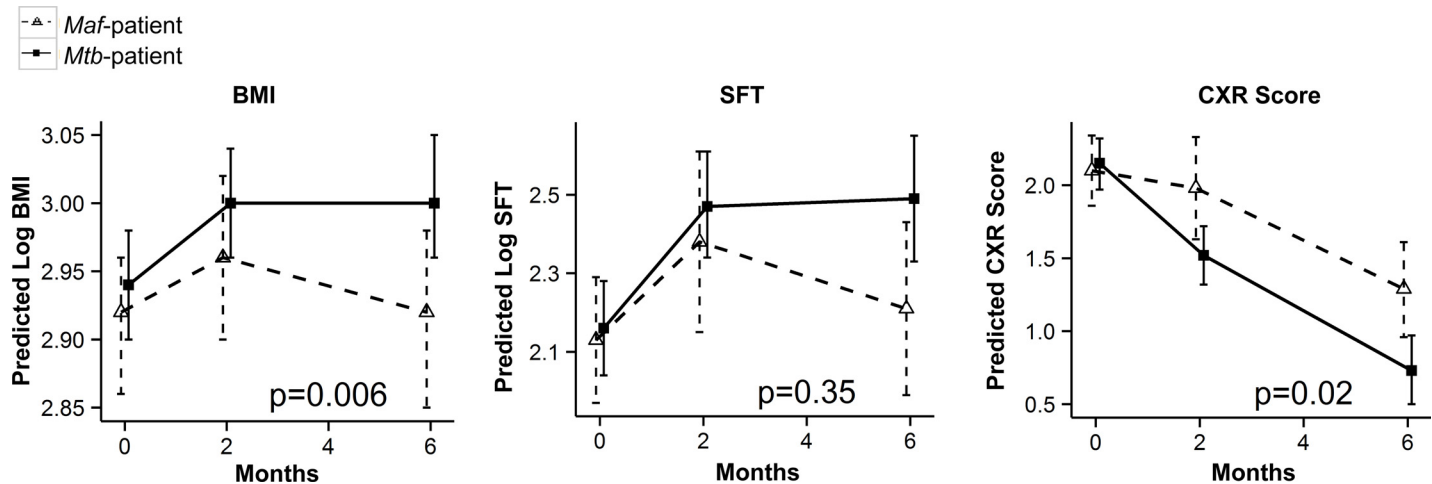

**Fig 1. Kinetics of the clinical outcomes in Maf- and Mtb-infected patients following treatment.** Line plots show the predicted mean and its 95% CI of Log transformed Body Mass Index (BMI) and Skinfold Thickness (SFT) in Maf- and Mtb-infected groups at 0, 2 and 6 months of treatment, Chest X-ray (CXR) was not Log transformed. Wald test through contrasts analysis following a random-intercept model adjusted for age, sex and ethnicity was used to assess interaction between lineage group and time point on clinical response. Maf group (dashed lines) and Mtb group (solid lines) respectively. P-values of the interactions are shown.

doi:10.1371/journal.pntd.0004701.g001

samples, the patterns of IL-12p70 and IL-15 were similar at 2 months, but differed significantly at 6 months of treatment, whereas those of IL-8, MIP-1 $\alpha$  and PDGF- $\beta\beta$  differed already at 2 months of treatment between the groups (interaction  $p < 0.001$ ; Fig 3A). In response to ESAT-6/CFP-10 stimulation, the patterns of IFN- $\gamma$  and GM-CSF were significantly different between the groups at 2 months of treatment (interaction  $p < 0.01$ ; Fig 3B).

### Differences in gene expression profiles between Maf- and Mtb-infected patients following treatment

Prior to treatment, there were significantly higher expression of *IL13* in unstimulated ( $p = 0.035$ ), and *BPI* in ESAT-6/CFP-10 stimulated ( $p = 0.02$ ) whole blood samples in Maf- compared to Mtb-infected patients (Fig 4, S3 Table). Likewise, post-treatment, *TLR9* and *IL12A* expression were significantly higher in Maf- compared to Mtb-infected patients in the unstimulated whole blood ( $p = 0.004$  and  $p = 0.007$  respectively; Fig 4, S4 Table). ESAT-6/CFP-10 stimulation induced significantly higher expression of *IL1B* ( $p = 0.01$ ), *CCL4* ( $p = 0.006$ ), *TLR4* ( $p = 0.03$ ) and *CXCL10* ( $p = 0.06$ ) in Mtb- compared to Maf-infected patients. Furthermore, stimulation with live Maf induced higher expression of *TBX21* ( $p = 0.03$ ), *NLRC4* ( $p = 0.06$ ), *ZNF331* ( $p = 0.06$ ), *IL23A* ( $p = 0.07$ ) and *TLR4* ( $p = 0.08$ ) in Mtb- than Maf-infected patients (Fig 4, S4 Table).

### Kinetics of gene expression in Maf- and Mtb-infected patients following treatment

In unstimulated whole blood, the patterns of *TLR9* and *IL12A* expression were significantly different between Maf and Mtb-infected patients at 2 months of treatment (interaction  $p = 0.004$  and  $p = 0.0005$  respectively; Fig 5A). In ESAT-6/CFP-10 stimulated whole blood, the kinetics of *CXCL10* expression differed between the groups at 2 months of treatment (interaction  $p = 0.04$ ; Fig 5B), while following live Maf stimulation, the kinetics of *NLRC4* expression was significantly different at 2 month of treatment between the groups (interaction  $p = 0.0007$ ; Fig 5C).

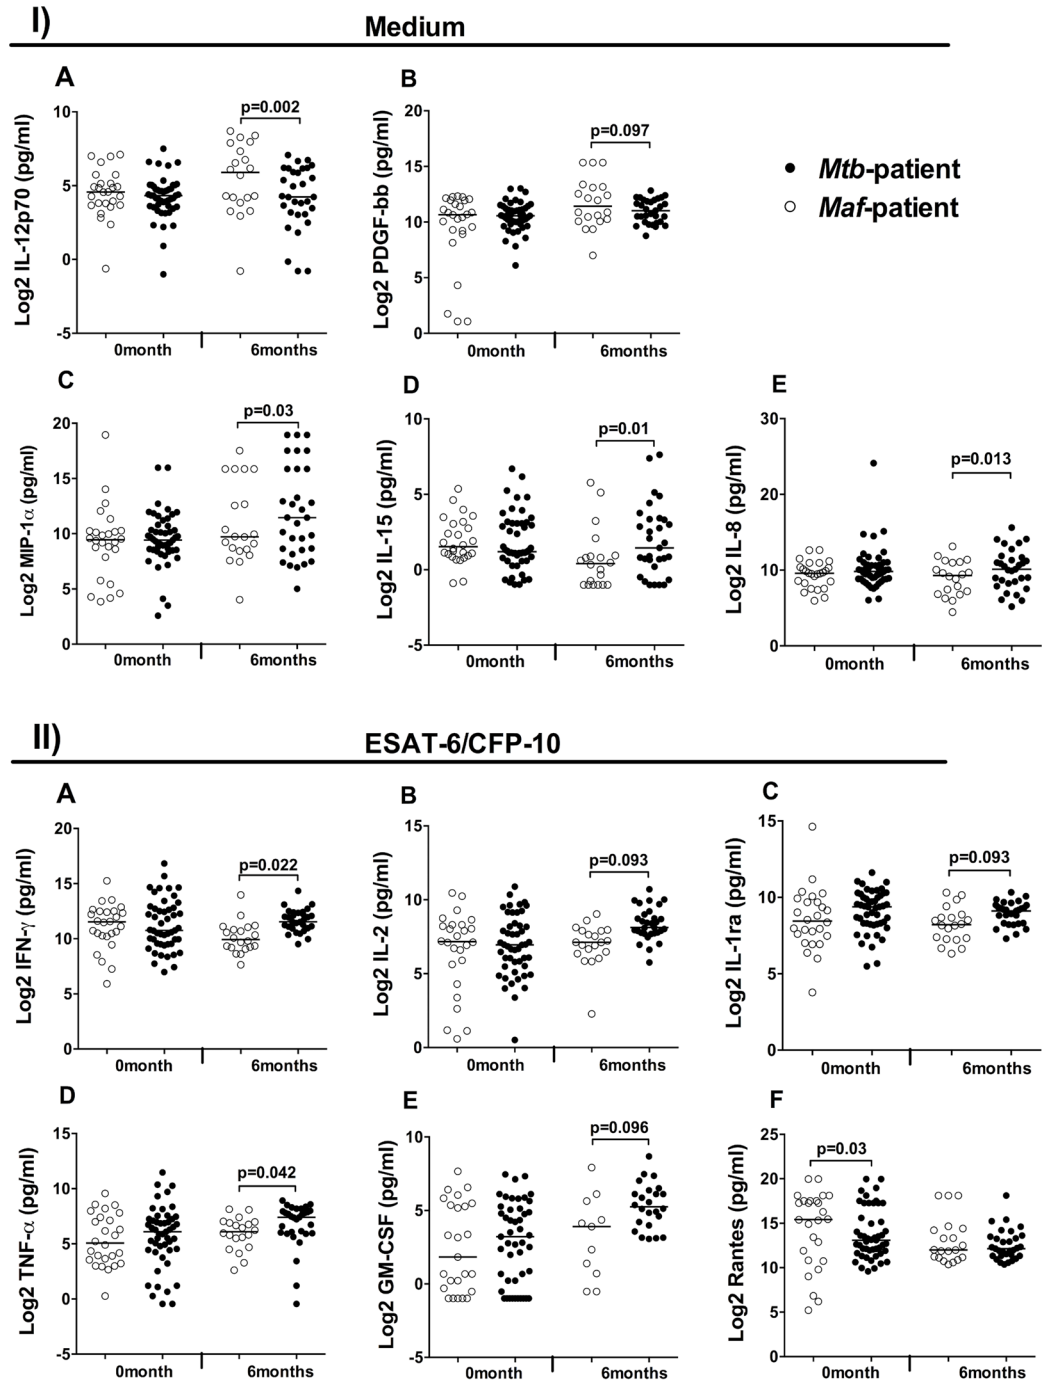

**Fig 2. Differential cytokine production between *Maf*- and *Mtb*-infected patients before and after treatment.** Whole blood incubated overnight with medium only (I), revealed differences in the concentrations of IL12p70 (A), PDGF- $\beta\beta$  (B), MIP-1 $\alpha$  (C), IL-15 (D) and IL-8 (E) between *Mtb*- and *Maf*-infected patients at 6 month of treatment. (II) Only ESAT-6/CFP-10 stimulation induced significant differences in cytokine production between *Mtb*- and *Maf*-infected patients above the background level of IFN- $\gamma$  (A), IL-2 (B), IL-1ra (C), TNF- $\alpha$  (D), GM-CSF (E) and Rantes (F). Dot plots show log-2 transformed cytokine concentrations measured with Bio-Plex assay. Horizontal bars indicate median cytokine concentration by lineage groups, *Maf*-infected patients (closed circles, n = 26 and 20) and *Mtb*-infected patients (open circles, n = 49 and 31) respectively at 0 and 6 months of TB treatment. Log-2 transformed cytokine concentrations were compared between lineage groups using a random-intercept model adjusted for age, sex and ethnicity, and Sidak multiple comparison correction. Contrasts analysis was used after estimation to compute the difference in each cytokine concentration between



lineage groups and used Wald test for assessing the significance at each time point. P-values of the differences are shown.

doi:10.1371/journal.pntd.0004701.g002

## Interactions of cytokines and genes differentially expressed between *Maf*- and *Mtb*-infected patients

The direct relationship among the 23 cytokines and genes differentially expressed between the *Maf* and *Mtb*-infected patients was analysed using the Ingenuity Pathway Analysis (IPA, QIAGEN Redwood City, USA, [www.qiagen.com/ingenuity](http://www.qiagen.com/ingenuity)). Ingenuity canonical pathway analysis identified a high enrichment in the communication between innate and adaptive immune cells. Analysis of the upstream regulators revealed a very high enrichment ( $p = 6.6 \times 10^{-21}$ ) of the nuclear factor NF-kappa-B p65 subunit (RELA) that regulates more than half ( $n = 12$ ) of the differentially expressed cytokines and genes between *Maf*- and *Mtb*-infected patients post-treatment. Interestingly, all the cytokines fitted into 2 network functions with the top one containing 13 of the 23 markers and centred on the NFκB complex (Fig 6).

## Discussion

We report here a comparison of clinical and immunological responses before and following standard anti-TB treatment between TB patients infected by *Maf* and *Mtb* lineages of the MTBC in The Gambia. We used an unbiased rigorous statistical approach that accounted for both intra and inter patient's group variation, experimental condition variability, repeated measurement over time and corrected for multiple comparison to identify biomarkers that are associated with MTBC lineage-specific pathogenesis and response to anti-TB treatment. Overall, before treatment there were no differences in clinical parameters and differences in very few cytokine concentrations and gene expression profiles between *Maf*- and *Mtb*-infected patients. However, after treatment the BMI, CXR, skinfold thickness and immunological responses were more significantly improved in *Mtb*- than in *Maf*-infected patients.

The high similarity in the peripheral blood cells populations, clinical presentation, cytokines production and genes expression profiles before treatment between *Maf*- and *Mtb*-infected patients further support uniformity in host responses after succumbing to infection, irrespective of the infecting lineage of MTBC as previously reported [13,15]. This result also suggests that *Maf* and *Mtb* lineages differences may not affect diagnosis of active TB based on the measurement of soluble cytokines.

The pattern of the changes after treatment are indicative of a quicker recovery from disease in *Mtb*-infected patients, which might be due to their stronger host immunity and/or a better immediate response to treatment of the *Mtb*-lineage 4 [10]. In contrast, the poorer improvement in the clinical outcome following treatment of *Maf*-infected patients could be related to the immune profile. Higher ratio of monocytes/lymphocytes following treatment has been attributed to unresolved infection with on-going inflammation [24]. The high IL-12p70 production in *Maf*-patients correlates with the higher expression of *IL12A* gene, which encodes IL-12p35, a subunit of IL-12p70 produced by macrophages to induce production of inflammatory cytokines from T helper-1 (Th1) and Th17 cells [25,26]. In addition, the increased *TLR9* expression also induces IL-12 production [27] that will further promote prolonged inflammatory processes, which could lead to poor weight gain [28,29] as seen in our *Maf*-infected patients.

IL-15 is a pleiotropic cytokine produced mainly by macrophages, activates a broad range of cells including T and NK cells [30], and promotes the survival of BALB/c mice infected with *Mtb* [31]. Increased MIP-1α levels in unstimulated plasma of HIV-negative TB patients were

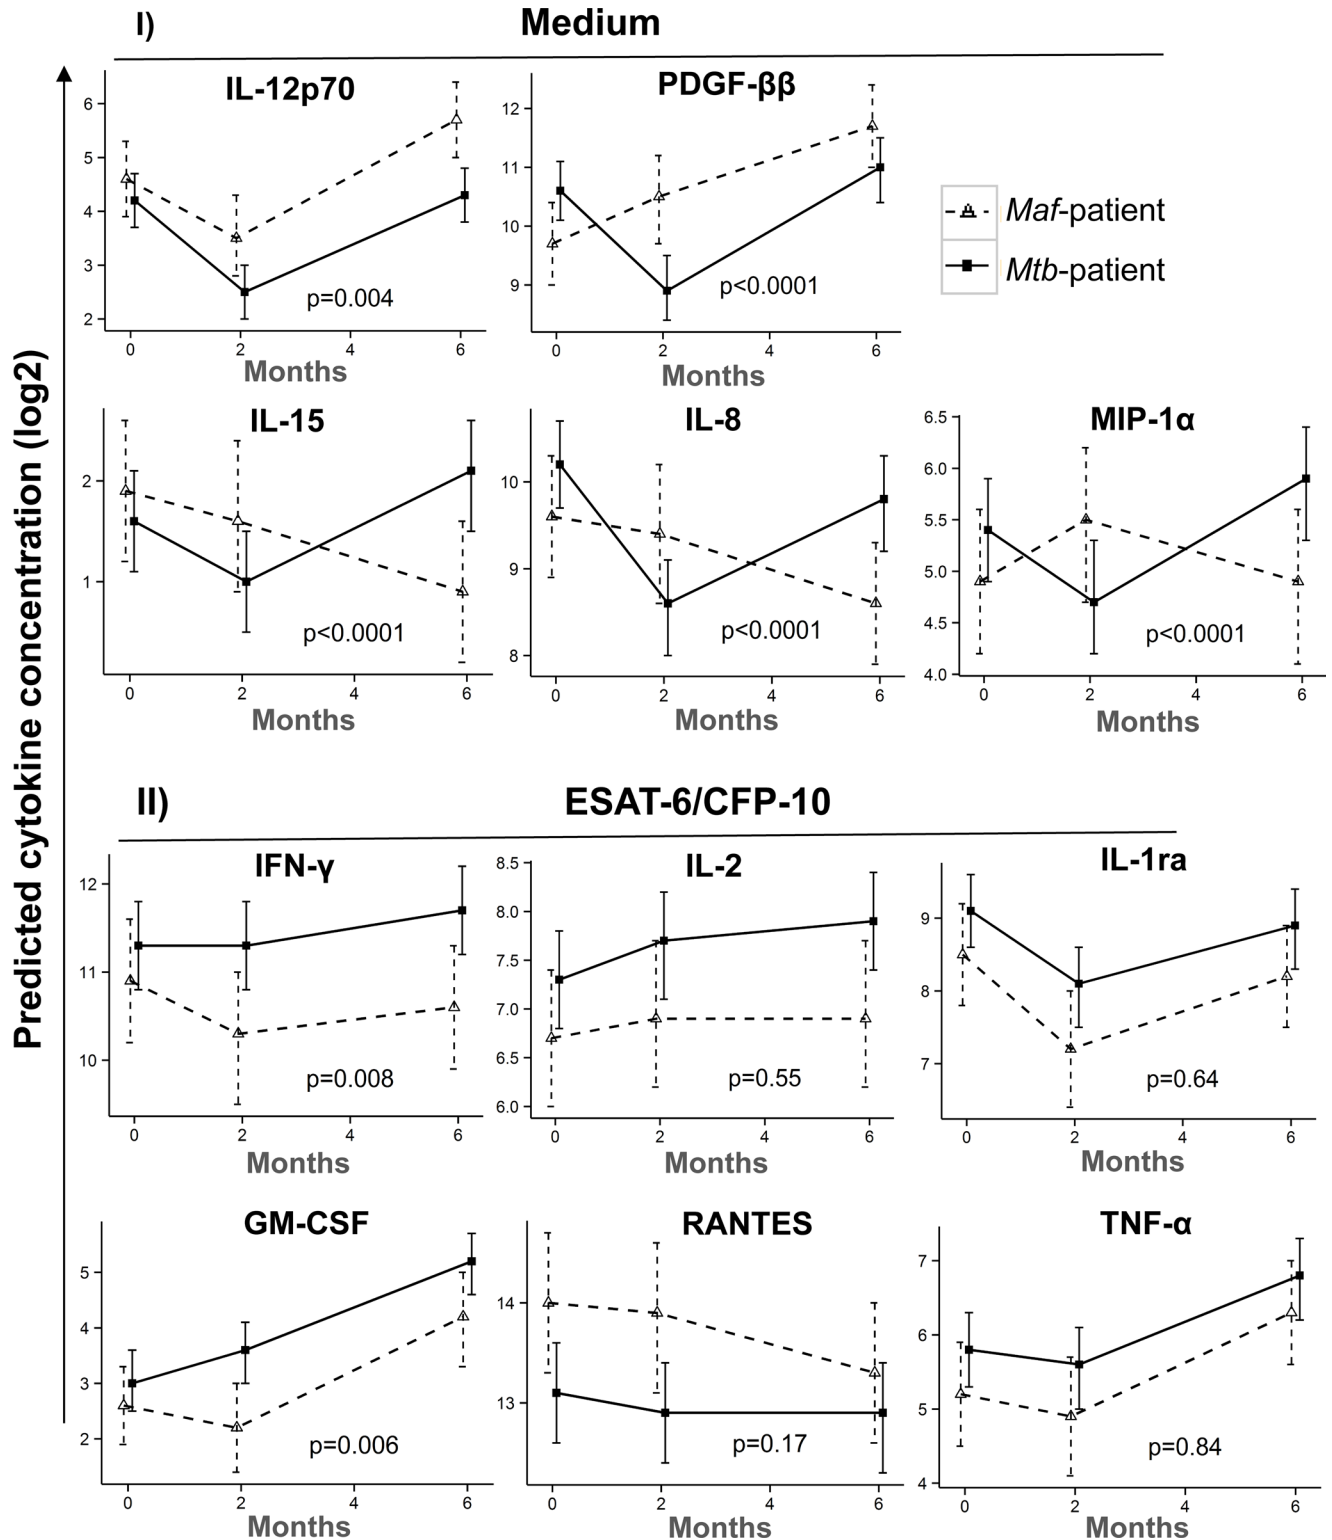

**Fig 3. Kinetics of cytokines production between Maf- and Mtb-infected groups following treatment.** The kinetics of cytokine expression showing either strong or weak evidence of difference between lineage groups following overnight incubation with Medium alone (I) or ESAT-6/CFP-10 (II). Line plots show the predicted mean and its 95% confidence interval (95% CI) of log<sub>2</sub> transformed cytokines concentration in Maf- and Mtb-infected groups at 0, 2 and 6 months of treatment. Wald test through contrasts analysis following a random-intercept model adjusted for age, sex and ethnicity was used to assess interaction between lineage group and time point on cytokine production. The legend shows Maf-infected group (dashed lines) and Mtb-infected group (solid lines) respectively. P-values of the interactions are shown.

doi:10.1371/journal.pntd.0004701.g003

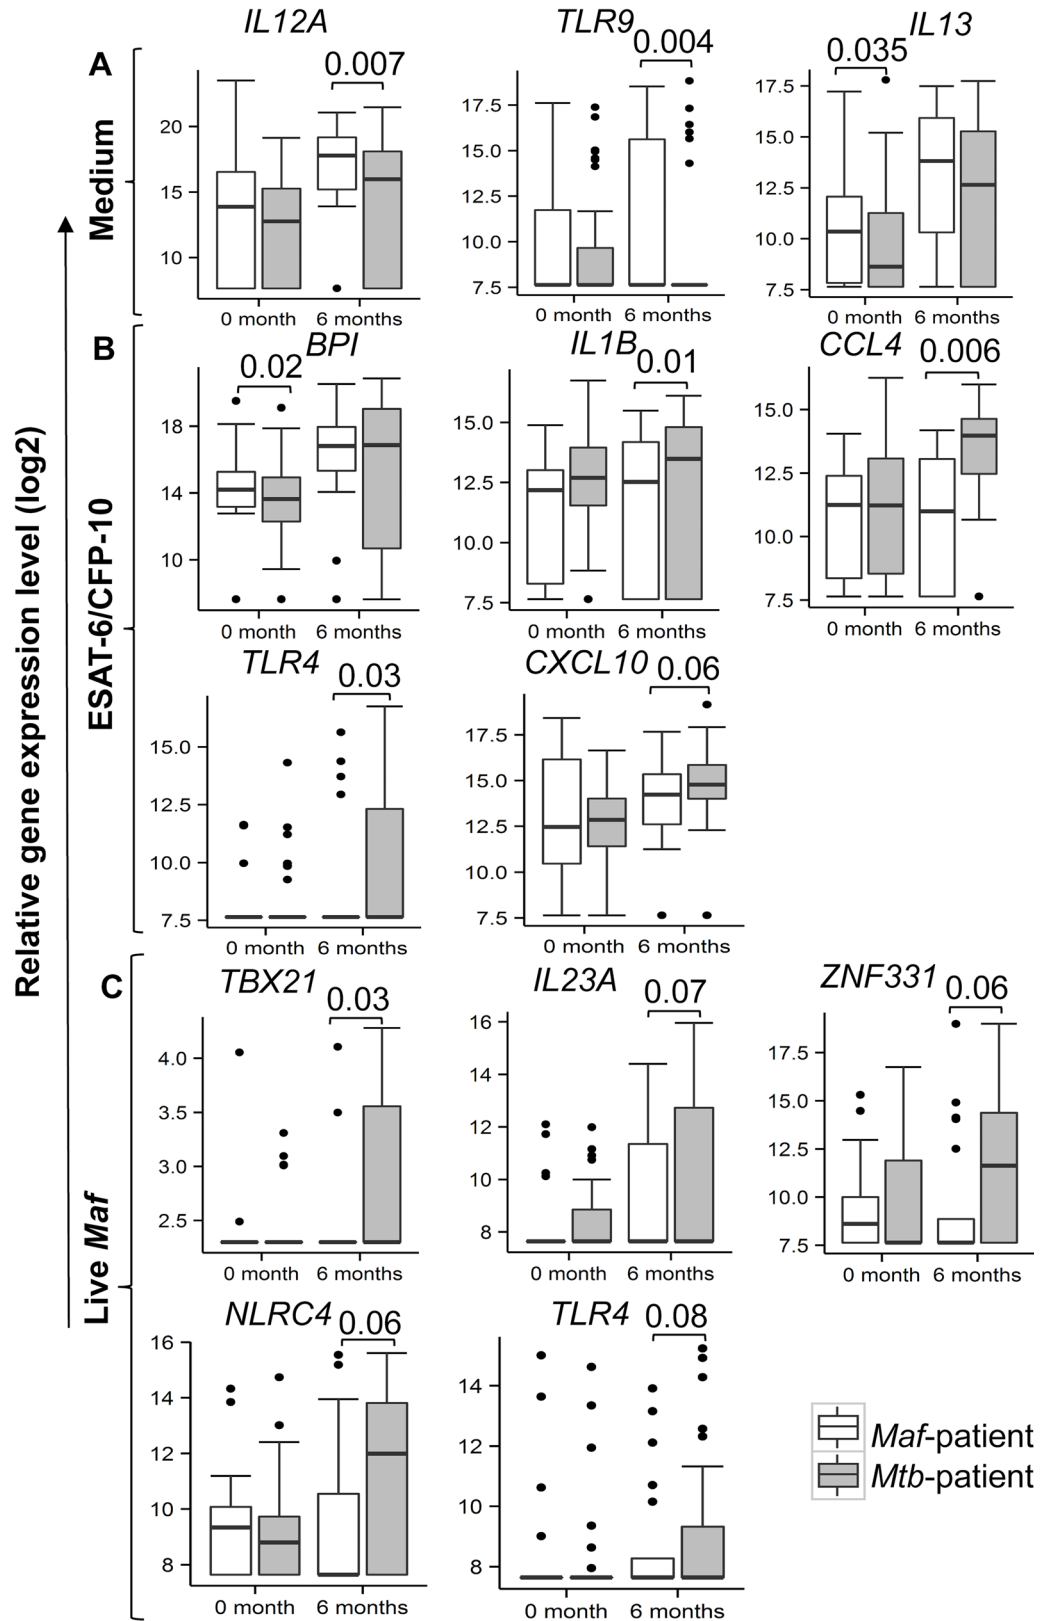

**Fig 4. Gene expression profiles differ between Maf- and Mtb-infected patients before and after treatment.** dcRT-MLPA was performed on RNA extracted from whole blood incubated overnight with medium

only (A), ESAT-6/CFP-10 (B) and live *Maf* (C). Median gene expression levels (peak areas normalized to GAPDH and log<sub>2</sub> transformed) of the indicated genes are shown in box-and-whisker plots. Equal number of samples were analysed at 0 and 6 months of treatment in each group of *Maf*-infected (n = 20; white boxes) and *Mtb*-infected (n = 31; grey boxes) patients, respectively. Log<sub>2</sub> transformed gene expression data were compared between the groups using contrast analysis following a random-intercept model adjusted for age, sex and ethnicity, and Sidak multiple comparison correction. Wald test was used to assess the significance at each time point. P-values of significant differences are shown.

doi:10.1371/journal.pntd.0004701.g004

associated with favourable treatment outcomes [32]. Therefore, the increased IL-15 and MIP-1 $\alpha$  in *Mtb*-infected patient after 2 months of treatment could reflect a better response to treatment in contrast to the *Maf*-infected patients.

The significantly higher CCL5 (RANTES) level and *IL13* and *BPI* expression in *Maf*- compared to *Mtb*-infected patients before treatment was not seen post-treatment, implying that treatment did not amplify the differences in the markers already detected pre-treatment but rather revealed new markers. Abundance of *IL13* has predicted progression to active tuberculosis disease in high-risk groups [33], suggesting higher susceptibility as well as a lower ability to mount adequate immune response to recover from disease in our *Maf*-infected patients. This is in line with our previous report of immune exhaustion, and higher prevalence among HIV-positive, severely malnourished and older individuals, of *Maf*-infected patients [1,15,16,34,35], implying that *Maf* mainly causes diseases in a permissive host environment.

ESAT-6/CFP-10 stimulation induced the greatest differences in cytokines concentration and genes expressed between the groups post-treatment. These were mainly pro-inflammatory markers that have previously been associated with protection, such as IFN- $\gamma$ , and were all significantly higher in *Mtb*- than *Maf*-infected patients. This suggests that the immune system of *Mtb*-infected patients were more capable of mounting a robust response to ESAT-6/CFP-10 on recovering following anti-TB treatment as previously described [15,36,37]. However, other studies have reported the opposite [38,39]. Lower cytokine response post-treatment in *Maf*-infected patients may reflect a poor immune recovery due to an ineffective response to treatment in this group, or a pre-TB immune suppressed state. This is further supported by a generally lower cytokine profile in response to all stimulants in this study, as well as corroborates with the previous finding of increased proportion of HIV-infected amongst patients with *Maf*-caused tuberculosis [34].

The enrichment of NF- $\kappa$ B activation-related genes among the differentially expressed biomarkers between the groups post-treatment is similar to previous reports [40,41]. NF- $\kappa$ B is a key nuclear transcription factor of pro-inflammatory genes activation [41], which corroborates our identified cytokines. We have previously reported high enrichment of HNF4- $\alpha$ , which regulated about 15% of all genes differentially expressed between *Maf*- and *Mtb*-infected patients post-treatment [13]. Low HNF4- $\alpha$  expression has been associated with worst prognosis of hepatocellular carcinoma (HCC) through a robust activation of RELA, whereas higher HNF4- $\alpha$  expression inhibited NF- $\kappa$ B expression and improved HCC outcome [42]. The enrichment of HNF4- $\alpha$  and NF- $\kappa$ B in our datasets is very interesting. Although we cannot yet establish a direct connection based on our current data, this might suggest that the dampened *Maf*-infected patient's pro-inflammatory response to antigen stimulation post-treatment occurs through the inhibition of NF- $\kappa$ B pathway.

Our study was nested within a platform that has a commendable record of treatment monitoring and completion. [43]. Although both *Mtb* and *Maf*-infected patients had negative smears for AFB by the end of the follow up, differences may not have been observed due to poor sensitivity of the microscopy method used [44]. The more sensitive culture conversion method is not used to monitor treatment in The Gambia and was therefore not used in our

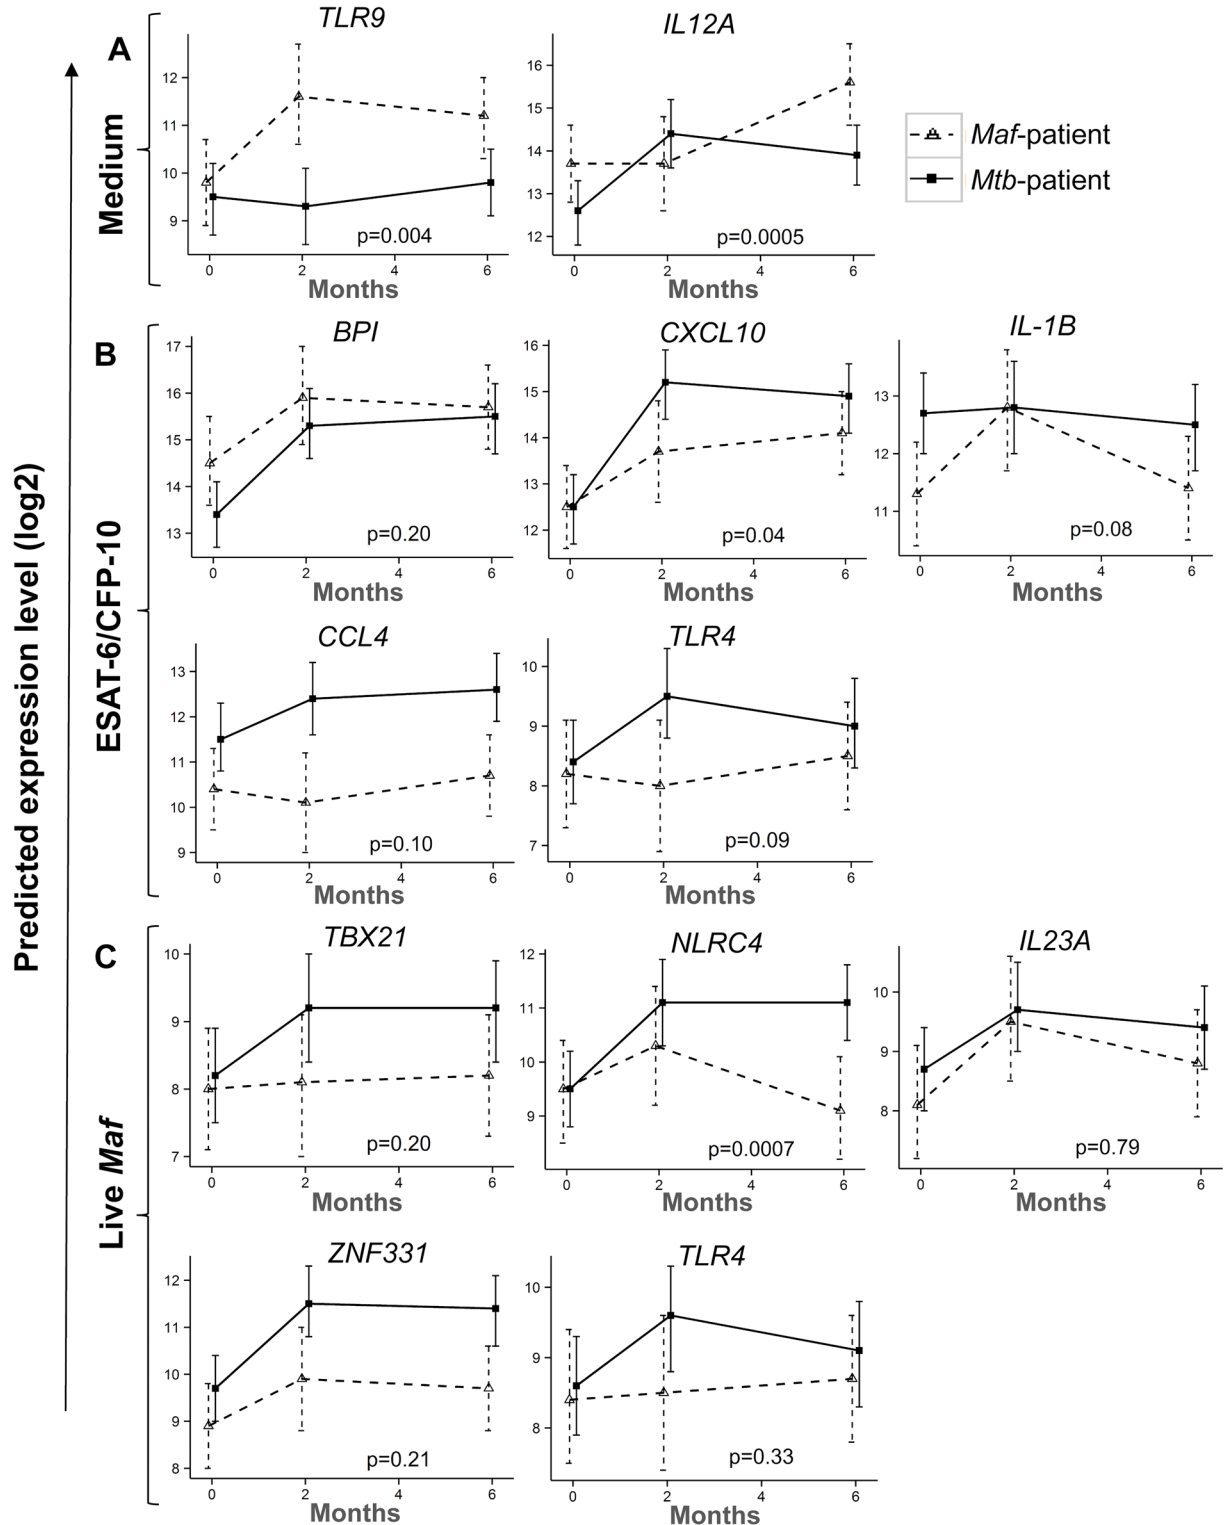

**Fig 5. Kinetics of gene expression in *Maf*- and *Mtb*-infected groups following treatment.** The expression kinetics of genes that showed significant differences between *Maf*- and *Mtb*-infected groups following overnight incubation with Medium alone (A), ESAT-6/CFP-10 (B) and live *Maf* (C). Line plots show the predicted mean and its 95% CI of log2 transformed gene expression levels in *Maf*- and *Mtb*-infected groups at 0, 2 and 6 months of treatment. Wald test through contrasts analysis following a random-intercept model adjusted for age, sex and ethnicity was used to assess interaction between lineage group and time point on gene expression. The legend shows *Maf*-infected group (dashed lines) and *Mtb*-infected group (solid lines) respectively. P-values of the interactions are shown.

doi:10.1371/journal.pntd.0004701.g005



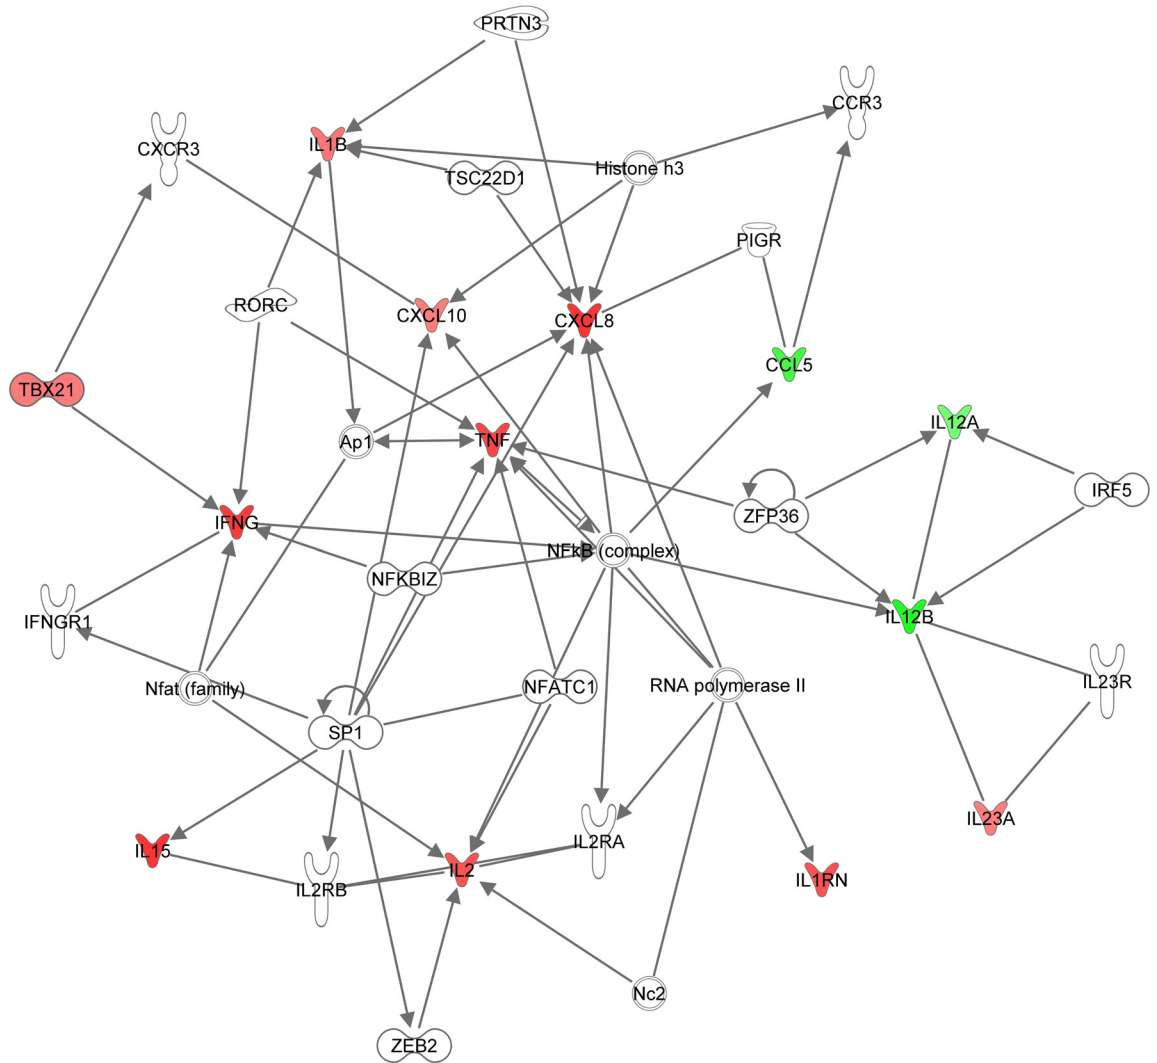

**Fig 6. Ingenuity network of direct relationship among genes and cytokines differentially expressed between Maf- and Mtb-infected patients.** Ingenuity network showing 13 of the 23 pro-inflammatory cytokines and genes that were differentially expressed between Maf- and Mtb- infected patients, centred on NF-κ complex. Genes or cytokines that were higher in Mtb- compared to Maf- infected patients are depicted in red, those that were lower in green.

doi:10.1371/journal.pntd.0004701.g006

study. In addition, although the drug resistance profile of the infecting organisms was not tested, The Gambia has a very low prevalence of TB drug resistance determined in the last survey performed in 2003 [45]. It is therefore unlikely that the different immune profiles observed post-treatment between the groups was due to drug resistance. Moreover, previous studies from West Africa showed that Maf is less likely to develop drug resistance compared to Mtb [46–48]. However, future studies should include systematic mycobacterial culture to monitor anti-TB treatment response and mycobacterial drug susceptibility testing in order to strengthen this evidence.

There was a striking similarity in the kinetics of cytokines and genes expression between Mtb- and Maf-infected patients during the first two months, but significant differences at 6 months of treatment. These together with the clinical responses provide a coherent and robust evidence of differential responses to treatment in Maf- and Mtb-infected patients. This pattern may indicate that the interval for differences to emerge between the groups by 2 months was

short and the difference at 6 month of treatment may reflect a slower rate of clinical and immunological disease resolution of *Maf*-infected TB patients. The fact that most differences between the two groups only emerge after 2 months of treatment suggest that *Maf*-infected patient may require longer intensive treatment phase, a longer treatment regimen overall, or reveals the pre-TB disease immune profile of the individuals. These results suggest that *Maf* leaves a permissive host profiles after treatment with poor lung function and health quality in general, which might promotes the susceptibility to future disease. It becomes important to investigate *Maf*-infected patients long-term recovery post-treatment and their risk of relapse or re-infection as a permissive host immunity could favour TB disease from *Maf*, which remains a less virulent bacillus [49] but yet has not been outcompeted by other *Mtb* lineages according to recent report in West Africa [35,48,50–56]. Moreover, *Maf* causes up to half of all tuberculosis cases in West Africa where the same treatment regimen is given irrespective of the infecting MTBC lineage. New host-directed therapeutic approaches that aim to reduce inflammatory responses associated with immunopathology might be proven useful for these patients [57,58]. Furthermore, these results demonstrate that the identification and evaluation of immunological biomarkers to monitor anti-tuberculosis treatment response in West Africa should consider the diversity of MTBC lineages.

Studies in *Maf* non-endemic regions have shown heterogeneous response to TB treatment depending on the infecting MTBC lineages [6,10,59]. However, other studies in highly heterogeneous populations found no effect of MTBC lineages, but rather patient ethnicity was a significant determinant for difference in treatment response [9,11]. Clearly, host and bacteria factors are important determinants for treatment response, therefore stratified approaches to TB treatment that account for MTBC lineages is required to improve treatment outcome especially now with clinical trials of shorter drug treatment regimen for TB [14,60].

In conclusion, our data show differences in clinical parameters and immune genes and proteins associated with inflammatory processes recovery between *Mtb*- and *Maf*-infected patients following anti-tuberculosis treatment. This profile may be an indication of differences in the resolution of disease or the pre-tuberculosis status of the host immune system. These findings may have public health relevance for therapeutic and biomarker discovery purposes, and warrant further investigation for the use of the identified biomarkers as potential targets for preventive or therapeutic intervention against tuberculosis.

## Supporting Information

**S1 Checklist. STROBE checklist.** List of pages and paragraphs containing keys information about this study. The pages and paragraphs numbers responding to the specific questions of the STROBE Checklist are provided to ease the reading of this manuscript and understanding the study.

(DOC)

**S1 Table. Estimated Difference (ED) and Estimated Incremental Difference (EID) of cytokines production between *Mtb* and *Maf*-infected patients by stimulants, adjusted for age, gender and ethnicity before anti-TB treatment.** Show the Estimated Difference (ED) of cytokines production in blood incubated with Medium only and the Estimated Incremental Difference (EID) of cytokines production above the baseline induced by the respective stimulants between *Mtb* and *Maf*-infected patients before treatment. The statistical analyses were done using a random intercept model based on restricted maximum likelihood (REML) and adjusted for age, gender and ethnicity as well as applying Sidak multiple comparison correction. Statistical significant ED and EID are highlighted in bold.

(DOCX)

**S2 Table. Estimated Difference (ED) and Estimated Incremental Difference (EID) of cytokines production between *Mtb* and *Maf*-infected patients by stimulants, adjusted for age, gender and ethnicity at 6 months of anti-TB treatment.** Show the Estimated Difference (ED) of cytokines production in blood incubated with Medium only and the Estimated Incremental Difference (EID) of cytokines production above the baseline induced by the respective stimulants between *Mtb* and *Maf*-infected patients at 6 months of treatment. The statistical analyses were done using a random intercept model based on restricted maximum likelihood (REML) and adjusted for age, gender and ethnicity as well as applying Sidak multiple comparison correction. Statistical significant ED and EID are highlighted in bold.

(DOCX)

**S3 Table. Estimated Difference (ED) and Estimated Incremental Difference (EID) in genes expression between *Mtb* and *Maf*-infected patients by stimulants, adjusted for age, gender and ethnicity before anti-TB treatment.** Show the Estimated Difference (ED) of genes expression in blood incubated with Medium only and the Estimated Incremental Difference (EID) of genes expression above the baseline induced by the respective stimulants between *Mtb* and *Maf*-infected patients before treatment. The statistical analyses were done using a random intercept model based on restricted maximum likelihood (REML) and adjusted for age, gender and ethnicity as well as applying Sidak multiple comparison correction. Statistical significant ED and EID are highlighted in bold.

(XLSX)

**S4 Table. Estimated Difference (ED) and Estimated Incremental Difference (EID) in genes expression between *Mtb* and *Maf*-infected patients by stimulants, adjusted for age, gender and ethnicity at 6 months of anti-TB treatment.** Show the Estimated Difference (ED) of genes expression in blood incubated with Medium only and the Estimated Incremental Difference (EID) of genes expression above the baseline induced by the respective stimulants between *Mtb* and *Maf*-infected patients at 6 months of treatment. The statistical analyses were done using a random intercept model based on restricted maximum likelihood (REML) and adjusted for age, gender and ethnicity as well as applying Sidak multiple comparison correction. Statistical significant ED and EID are highlighted in bold.

(XLSX)

## Acknowledgments

We thank the Gambian National Leprosy and Tuberculosis Programme for their continuing collaboration. We are also grateful to study participants, field workers, especially K Kanyi, M. Davies and O Ceesay for performing sample collection, MRC TB clinical staff and P Camara for obtaining consent and enrolling participants, TB immunology and TB diagnostic laboratory staff, and P Owiafe, A Bojang, J Mendy, J Otu and F Mendy for laboratory assistance. We also thank T Togun for clinical examination of some study patients.

## Author Contributions

Conceived and designed the experiments: LDT MOO HMD JSS. Performed the experiments: LDT MCH MD EQ. Analyzed the data: LDT SCA. Contributed reagents/materials/analysis tools: LDT BK MA THMO MCH MOO. Wrote the paper: LDT MOO HMD MCH JSS BK. Collected epidemiology and clinical information: LDT SD MOO IMA.

## References

- de Jong BC, Antonio M, Gagneux S. *Mycobacterium africanum*-review of an important cause of human tuberculosis in West Africa. PLoS Negl Trop Dis. 2010; 4(9):e744. doi: [10.1371/journal.pntd.0000744](https://doi.org/10.1371/journal.pntd.0000744) PMID: [20927191](https://pubmed.ncbi.nlm.nih.gov/20927191/)
- Gagneux S. Host-pathogen coevolution in human tuberculosis. Philosophical transactions of the Royal Society of London Series B, Biological sciences. 2012; 367(1590):850–9. doi: [10.1098/rstb.2011.0316](https://doi.org/10.1098/rstb.2011.0316) PMID: [22312052](https://pubmed.ncbi.nlm.nih.gov/22312052/)
- Bloom CI, Graham CM, Berry MP, Wilkinson KA, Oni T, Rozakeas F, et al. Detectable changes in the blood transcriptome are present after two weeks of antituberculosis therapy. PLoS One. 2012; 7(10):e46191. doi: [10.1371/journal.pone.0046191](https://doi.org/10.1371/journal.pone.0046191) PMID: [23056259](https://pubmed.ncbi.nlm.nih.gov/23056259/)
- Cliff JM, Lee JS, Constantinou N, Cho JE, Clark TG, Ronacher K, et al. Distinct phases of blood gene expression pattern through tuberculosis treatment reflect modulation of the humoral immune response. J Infect Dis. 2013; 207(1):18–29. doi: [10.1093/infdis/jis499](https://doi.org/10.1093/infdis/jis499) PMID: [22872737](https://pubmed.ncbi.nlm.nih.gov/22872737/)
- Cliff JM, Kaufmann SH, McShane H, van Helden P, O'Garra A. The human immune response to tuberculosis and its treatment: a view from the blood. Immunol Rev. 2015; 264(1):88–102. doi: [10.1111/immr.12269](https://doi.org/10.1111/immr.12269) PMID: [25703554](https://pubmed.ncbi.nlm.nih.gov/25703554/)
- Click ES, Winston CA, Oeltmann JE, Moonan PK, Mac Kenzie WR. Association between *Mycobacterium tuberculosis* lineage and time to sputum culture conversion. Int J Tuberc Lung Dis. 2013; 17(7):878–84. doi: [10.5588/ijtld.12.0732](https://doi.org/10.5588/ijtld.12.0732) PMID: [23743308](https://pubmed.ncbi.nlm.nih.gov/23743308/)
- Coscolla M, Gagneux S. Consequences of genomic diversity in *Mycobacterium tuberculosis*. Seminars in immunology. 2014; 26(6):431–44. doi: [10.1016/j.smim.2014.09.012](https://doi.org/10.1016/j.smim.2014.09.012) PMID: [25453224](https://pubmed.ncbi.nlm.nih.gov/25453224/)
- Gumbo T. Biological variability and the emergence of multidrug-resistant tuberculosis. Nat Genet. 2013; 45(7):720–1. doi: [10.1038/ng.2675](https://doi.org/10.1038/ng.2675) PMID: [23800865](https://pubmed.ncbi.nlm.nih.gov/23800865/)
- Coussens AK, Wilkinson RJ, Nikolayevskyy V, Elkington PT, Hanifa Y, Islam K, et al. Ethnic variation in inflammatory profile in tuberculosis. PLoS Pathog. 2013; 9(7):e1003468. doi: [10.1371/journal.ppat.1003468](https://doi.org/10.1371/journal.ppat.1003468) PMID: [23853590](https://pubmed.ncbi.nlm.nih.gov/23853590/)
- Ford CB, Shah RR, Maeda MK, Gagneux S, Murray MB, Cohen T, et al. *Mycobacterium tuberculosis* mutation rate estimates from different lineages predict substantial differences in the emergence of drug-resistant tuberculosis. Nat Genet. 2013; 45(7):784–90. doi: [10.1038/ng.2656](https://doi.org/10.1038/ng.2656) PMID: [23749189](https://pubmed.ncbi.nlm.nih.gov/23749189/)
- Pareek M, Evans J, Innes J, Smith G, Hingley-Wilson S, Loughheed KE, et al. Ethnicity and mycobacterial lineage as determinants of tuberculosis disease phenotype. Thorax. 2013; 68(3):221–9. doi: [10.1136/thoraxjnl-2012-201824](https://doi.org/10.1136/thoraxjnl-2012-201824) PMID: [23019255](https://pubmed.ncbi.nlm.nih.gov/23019255/)
- Nahid P, Bliven EE, Kim EY, Mac Kenzie WR, Stout JE, Diem L, et al. Influence of *M. tuberculosis* lineage variability within a clinical trial for pulmonary tuberculosis. PLoS One. 2010; 5(5):e10753. doi: [10.1371/journal.pone.0010753](https://doi.org/10.1371/journal.pone.0010753) PMID: [20505778](https://pubmed.ncbi.nlm.nih.gov/20505778/)
- Tientcheu LD, Maertzdorf J, Weiner J, Adetifa IM, Mollenkopf HJ, Sutherland JS, et al. Differential transcriptomic and metabolic profiles of *M. africanum*- and *M. tuberculosis*-infected patients after, but not before, drug treatment. Genes Immun. 2015; 16(5):347–55. doi: [10.1038/gene.2015.21](https://doi.org/10.1038/gene.2015.21) PMID: [26043170](https://pubmed.ncbi.nlm.nih.gov/26043170/)
- Merle CS, Fielding K, Sow OB, Gninafon M, Lo MB, Mthiyane T, et al. A four-month rifampin-containing regimen for treating tuberculosis. N Engl J Med. 2014; 371(17):1588–98. doi: [10.1056/NEJMoa1315817](https://doi.org/10.1056/NEJMoa1315817) PMID: [25337748](https://pubmed.ncbi.nlm.nih.gov/25337748/)
- Tientcheu LD, Sutherland JS, de Jong BC, Kampmann B, Jafali J, Adetifa IM, et al. Differences in T-cell responses between *Mycobacterium tuberculosis* and *Mycobacterium africanum*-infected patients. Eur J Immunol. 2014; 44(5):1387–98. doi: [10.1002/eji.201343956](https://doi.org/10.1002/eji.201343956) PMID: [24481948](https://pubmed.ncbi.nlm.nih.gov/24481948/)
- de Jong BC, Hill PC, Aiken A, Jeffries DJ, Onipede A, Small PM, et al. Clinical presentation and outcome of tuberculosis patients infected by *M. africanum* versus *M. tuberculosis*. Int J Tuberc Lung Dis. 2007; 11(4):450–6. PMID: [17394693](https://pubmed.ncbi.nlm.nih.gov/17394693/)
- de Jong BC, Antonio M, Awine T, Ogungbemi K, de Jong YP, Gagneux S, et al. Use of spoligotyping and large sequence polymorphisms to study the population structure of the *Mycobacterium tuberculosis* complex in a cohort study of consecutive smear-positive tuberculosis cases in The Gambia. J Clin Microbiol. 2009; 47(4):994–1001. doi: [10.1128/JCM.01216-08](https://doi.org/10.1128/JCM.01216-08) PMID: [19193842](https://pubmed.ncbi.nlm.nih.gov/19193842/)
- WHO. Treatment of tuberculosis GUIDELINES Fourth edition World Health Organisation. 2010. [http://apps.who.int/iris/bitstream/10665/44165/1/9789241547833\\_eng.pdf](http://apps.who.int/iris/bitstream/10665/44165/1/9789241547833_eng.pdf)
- Galagan JE, Sisk P, Stolte C, Weiner B, Koehrsen M, Wymore F, et al. TB database 2010: overview and update. Tuberculosis (Edinb). 2010; 90(4):225–35. PMID: [20488753](https://pubmed.ncbi.nlm.nih.gov/20488753/)
- Joosten SA, Goeman JJ, Sutherland JS, Opmeer L, de Boer KG, Jacobsen M, et al. Identification of biomarkers for tuberculosis disease using a novel dual-color RT-MLPA assay. Genes Immun. 2012; 13(1):71–82. doi: [10.1038/gene.2011.64](https://doi.org/10.1038/gene.2011.64) PMID: [21956656](https://pubmed.ncbi.nlm.nih.gov/21956656/)

21. Satti L, Ikram A, Abbasi S, Malik N, Mirza IA, Martin A. Evaluation of thin-layer agar 7H11 for the isolation of *Mycobacterium tuberculosis* complex. *Int J Tuberc Lung Dis*. 2010; 14(10):1354–6. PMID: [20843431](#).
22. Reuter MA, Pecora ND, Harding CV, Canaday DH, McDonald D. *Mycobacterium tuberculosis* promotes HIV trans-infection and suppresses major histocompatibility complex class II antigen processing by dendritic cells. *J Virol*. 2010; 84(17):8549–60. doi: [10.1128/JVI.02303-09](#) PMID: [20592078](#)
23. Sidak Z. Rectangular confidence regions for the means of multivariate normal distributions. *J Amer Stat Assoc* 1967; 62:626–33.
24. Wang J, Yin Y, Wang X, Pei H, Kuai S, Gu L, et al. Ratio of monocytes to lymphocytes in peripheral blood in patients diagnosed with active tuberculosis. *Braz J Infect Dis*. 2015; 19(2):125–31. doi: [10.1016/j.bjid.2014.10.008](#) PMID: [25529365](#).
25. Khader SA, Pearl JE, Sakamoto K, Gilmartin L, Bell GK, Jelley-Gibbs DM, et al. IL-23 compensates for the absence of IL-12p70 and is essential for the IL-17 response during tuberculosis but is dispensable for protection and antigen-specific IFN-gamma responses if IL-12p70 is available. *J Immunol*. 2005; 175(2):788–95. 175/2/788 [pii]. PMID: [16002675](#).
26. Kay MK, Linke L, Triantis J, Salman MD, Larsen RS. Evaluation of DNA extraction techniques for detecting *Mycobacterium tuberculosis* complex organisms in Asian elephant trunk wash samples. *J Clin Microbiol*. 2011; 49(2):618–23. doi: [10.1128/JCM.00807-10](#) PMID: [21159933](#)
27. Bafica A, Scanga CA, Feng CG, Leifer C, Cheever A, Sher A. TLR9 regulates Th1 responses and cooperates with TLR2 in mediating optimal resistance to *Mycobacterium tuberculosis*. *J Exp Med*. 2005; 202(12):1715–24. doi: [10.1084/jem.20051782](#) PMID: [16365150](#)
28. O'Sullivan DM, McHugh TD, Gillespie SH. Mapping the fitness of *Mycobacterium tuberculosis* strains: a complex picture. *J Med Microbiol*. 2010; 59(12):1533–5. doi: [10.1099/jmm.0.019091-0](#) PMID: [20724506](#)
29. Yu CC, Chang CY, Liu CE, Shih LF, Hsiao JH, Chen CH. Drug resistance pattern of *Mycobacterium tuberculosis* complex at a medical center in central Taiwan, 2003–2007. *J Microbiol Immunol Infect*. 2010; 43(4):285–90. doi: [10.1016/S1684-1182\(10\)60045-X](#) PMID: [20688288](#).
30. Umemura M, Nishimura H, Hirose K, Matsuguchi T, Yoshikai Y. Overexpression of IL-15 in vivo enhances protection against *Mycobacterium bovis* bacillus Calmette-Guerin infection via augmentation of NK and T cytotoxic 1 responses. *J Immunol*. 2001; 167(2):946–56. PMID: [11441103](#).
31. Maeurer MJ, Trinder P, Hommel G, Walter W, Freitag K, Atkins D, et al. Interleukin-7 or interleukin-15 enhances survival of *Mycobacterium tuberculosis*-infected mice. *Infect Immun*. 2000; 68(5):2962–70. PMID: [10768995](#)
32. Mihret A, Abebe M, Bekele Y, Aseffa A, Walzl G, Howe R. Impact of HIV co-infection on plasma level of cytokines and chemokines of pulmonary tuberculosis patients. *BMC Infect Dis*. 2014; 14:125. doi: [10.1186/1471-2334-14-125](#) PMID: [24592945](#)
33. Shakoor S, Ahsan T, Jabeen K, Raza M, Hasan R. Use of p-nitrobenzoic acid in 7H10 agar for identification of *Mycobacterium tuberculosis* complex: a field study. *Int J Tuberc Lung Dis*. 2010; 14(12):1644–6. PMID: [21144253](#).
34. de Jong BC, Hill PC, Brookes RH, Otu JK, Peterson KL, Small PM, et al. *Mycobacterium africanum*: a new opportunistic pathogen in HIV infection? *AIDS*. 2005; 19(15):1714–5. 00002030-200510140-00030. PMID: [16184053](#).
35. de Jong BC, Adetifa I, Walther B, Hill PC, Antonio M, Ota M, et al. Differences between tuberculosis cases infected with *Mycobacterium africanum*, West African type 2, relative to Euro-American *Mycobacterium tuberculosis*: an update. *FEMS Immunol Med Microbiol*. 2010; 58(1):102–5. doi: [10.1111/j.1574-695X.2009.00628.x](#) PMID: [20002176](#)
36. Jackson-Sillah D, Cliff JM, Mensah GI, Dickson E, Sowah S, Tetteh JK, et al. Recombinant ESAT-6-CFP10 Fusion Protein Induction of Th1/Th2 Cytokines and FoxP3 Expressing Treg Cells in Pulmonary TB. *PLoS One*. 2013; 8(6):e68121. doi: [10.1371/journal.pone.0068121](#) PMID: [23826366](#)
37. Mensah GI, Addo KK, Tetteh JA, Sowah S, Loescher T, Geldmacher C, et al. Cytokine response to selected MTB antigens in Ghanaian TB patients, before and at 2 weeks of anti-TB therapy is characterized by high expression of IFN-gamma and Granzyme B and inter-individual variation. *BMC Infect Dis*. 2014; 14:495. doi: [10.1186/1471-2334-14-495](#) PMID: [25209422](#)
38. Mattos AM, Almeida Cde S, Franken KL, Alves CC, Abramo C, de Souza MA, et al. Increased IgG1, IFN-gamma, TNF-alpha and IL-6 responses to *Mycobacterium tuberculosis* antigens in patients with tuberculosis are lower after chemotherapy. *Int Immunol*. 2010; 22(9):775–82. doi: [10.1093/intimm/dxq429](#) PMID: [20624776](#)
39. Kaneko Y, Nakayama K, Kinoshita A, Kurita Y, Odashima K, Saito Z, et al. Relation between recurrence of tuberculosis and transitional changes in IFN-gamma release assays. *Am J Respir Crit Care Med*. 2015; 191(4):480–3. doi: [10.1164/rccm.201409-1590LE](#) PMID: [25679108](#).



40. Kaewseekhao B, Naranbhai V, Roytrakul S, Namwat W, Paemane A, Lulitanond V, et al. Comparative Proteomics of Activated THP-1 Cells Infected with *Mycobacterium tuberculosis* Identifies Putative Clearance Biomarkers for Tuberculosis Treatment. *PLoS One*. 2015; 10(7):e0134168. doi: [10.1371/journal.pone.0134168](https://doi.org/10.1371/journal.pone.0134168) PMID: [26214306](https://pubmed.ncbi.nlm.nih.gov/26214306/)
41. Huang KH, Wang CH, Lin CH, Kuo HP. NF-kappaB repressing factor downregulates basal expression and *Mycobacterium tuberculosis* induced IP-10 and IL-8 synthesis via interference with NF-kappaB in monocytes. *Journal of biomedical science*. 2014; 21:71. doi: [10.1186/s12929-014-0071-5](https://doi.org/10.1186/s12929-014-0071-5) PMID: [25135111](https://pubmed.ncbi.nlm.nih.gov/25135111/)
42. Ning BF, Ding J, Liu J, Yin C, Xu WP, Cong WM, et al. Hepatocyte nuclear factor 4alpha-nuclear factor-kappaB feedback circuit modulates liver cancer progression. *Hepatology*. 2014. doi: [10.1002/hep.27177](https://doi.org/10.1002/hep.27177) PMID: [24752868](https://pubmed.ncbi.nlm.nih.gov/24752868/).
43. WHO. Global Tuberculosis Report 2015. World Health Organization 2015; 20th Edition. [http://apps.who.int/iris/bitstream/10665/191102/1/9789241565059\\_eng.pdf](http://apps.who.int/iris/bitstream/10665/191102/1/9789241565059_eng.pdf)
44. Horne DJ, Royce SE, Gooze L, Narita M, Hopewell PC, Nahid P, et al. Sputum monitoring during tuberculosis treatment for predicting outcome: systematic review and meta-analysis. *Lancet Infect Dis*. 2010; 10(6):387–94. doi: [10.1016/S1473-3099\(10\)70071-2](https://doi.org/10.1016/S1473-3099(10)70071-2) PMID: [20510279](https://pubmed.ncbi.nlm.nih.gov/20510279/)
45. Adegbola RA, Hill P, Baldeh I, Otu J, Sarr R, Sillah J, et al. Surveillance of drug-resistant *Mycobacterium tuberculosis* in The Gambia. *Int J Tuberc Lung Dis*. 2003; 7(4):390–3. PMID: [12729346](https://pubmed.ncbi.nlm.nih.gov/12729346/)
46. Yeboah-Manu D, Asante-Poku A, Bodmer T, Stucki D, Koram K, Bonsu F, et al. Genotypic diversity and drug susceptibility patterns among *M. tuberculosis* complex isolates from South-Western Ghana. *PLoS One*. 2011; 6(7):e21906. doi: [10.1371/journal.pone.0021906](https://doi.org/10.1371/journal.pone.0021906) PMID: [21779354](https://pubmed.ncbi.nlm.nih.gov/21779354/)
47. Traore B, Diarra B, Dembele BP, Somboro AM, Hammond AS, Siddiqui S, et al. Molecular strain typing of *Mycobacterium tuberculosis* complex in Bamako, Mali. *Int J Tuberc Lung Dis*. 2012; 16(7):911–6. doi: [10.5588/ijtld.11.0397](https://doi.org/10.5588/ijtld.11.0397) PMID: [22508197](https://pubmed.ncbi.nlm.nih.gov/22508197/)
48. Winglee K, Manson McGuire A, Maiga M, Abeel T, Shea T, Desjardins CA, et al. Whole Genome Sequencing of *Mycobacterium africanum* Strains from Mali Provides Insights into the Mechanisms of Geographic Restriction. *PLoS Negl Trop Dis*. 2016; 10(1):e0004332. doi: [10.1371/journal.pntd.0004332](https://doi.org/10.1371/journal.pntd.0004332) PMID: [26751217](https://pubmed.ncbi.nlm.nih.gov/26751217/).
49. Via LE, Weiner DM, Schimel D, Lin PL, Dayao E, Tankersley SL, et al. Differential virulence and disease progression following *Mycobacterium tuberculosis* complex infection of the common marmoset (*Callithrix jacchus*). *Infect Immun*. 2013; 81(8):2909–19. doi: [10.1128/IAI.00632-13](https://doi.org/10.1128/IAI.00632-13) PMID: [23716617](https://pubmed.ncbi.nlm.nih.gov/23716617/)
50. Lawson L, Zhang J, Gomgnimbou MK, Abdurrahman ST, Le Moullec S, Mohamed F, et al. A molecular epidemiological and genetic diversity study of tuberculosis in Ibadan, Nnewi and Abuja, Nigeria. *PLoS One*. 2012; 7(6):e38409. doi: [10.1371/journal.pone.0038409](https://doi.org/10.1371/journal.pone.0038409) PMID: [22723859](https://pubmed.ncbi.nlm.nih.gov/22723859/)
51. Asante-Poku A, Yeboah-Manu D, Otchere ID, Aboagye SY, Stucki D, Hattendorf J, et al. *Mycobacterium africanum* Is Associated with Patient Ethnicity in Ghana. *PLoS Negl Trop Dis*. 2015; 9(1):e3370. doi: [10.1371/journal.pntd.0003370](https://doi.org/10.1371/journal.pntd.0003370) PMID: [25569290](https://pubmed.ncbi.nlm.nih.gov/25569290/)
52. Gomgnimbou MK, Refregier G, Diabougoua SP, Adama S, Kabore A, Ouiminga A, et al. Spoligotyping of *Mycobacterium africanum*, Burkina Faso. *Emerg Infect Dis*. 2012; 18(1):117–9. doi: [10.3201/eid1801.110275](https://doi.org/10.3201/eid1801.110275) PMID: [22257494](https://pubmed.ncbi.nlm.nih.gov/22257494/).
53. Thumamo BP, Asuquo AE, Abia-Bassey LN, Lawson L, Hill V, Zozio T, et al. Molecular epidemiology and genetic diversity of *Mycobacterium tuberculosis* complex in the Cross River State, Nigeria. *Infect Genet Evol*. 2012; 12(4):671–7. doi: [10.1016/j.meegid.2011.08.011](https://doi.org/10.1016/j.meegid.2011.08.011) PMID: [21878397](https://pubmed.ncbi.nlm.nih.gov/21878397/)
54. Affolabi D, Anyo G, Faihun F, Sanoussi N, Shamputa IC, Rigouts L, et al. First molecular epidemiological study of tuberculosis in Benin. *Int J Tuberc Lung Dis*. 2009; 13(3):317–22. PMID: [19275790](https://pubmed.ncbi.nlm.nih.gov/19275790/)
55. Gehre F, Antonio M, Faihun F, Odoun M, Uwizeye C, de Rijk P, et al. The first phylogeographic population structure and analysis of transmission dynamics of *M. africanum* West African 1-combining molecular data from Benin, Nigeria and Sierra Leone. *PLoS One*. 2013; 8(10):e77000. doi: [10.1371/journal.pone.0077000](https://doi.org/10.1371/journal.pone.0077000) PMID: [24143198](https://pubmed.ncbi.nlm.nih.gov/24143198/)
56. Gehre F, Kumar S, Kendall L, Ejo M, Secka O, Ofori-Anyinam B, et al. A Mycobacterial Perspective on Tuberculosis in West Africa: Significant Geographical Variation of *M. africanum* and Other *M. tuberculosis* Complex Lineages. *PLoS Negl Trop Dis*. 2016; 10(3):e0004408. PMID: [26964059](https://pubmed.ncbi.nlm.nih.gov/26964059/) PMCID: [4786107](https://pubmed.ncbi.nlm.nih.gov/4786107/). doi: [10.1371/journal.pntd.0004408](https://doi.org/10.1371/journal.pntd.0004408)
57. Zumla A, Maeurer M, Host-Directed Therapies N, Chakaya J, Hoelscher M, Ntoumi F, et al. Towards host-directed therapies for tuberculosis. *Nature reviews Drug discovery*. 2015; 14(8):511–2. doi: [10.1038/nrd4696](https://doi.org/10.1038/nrd4696) PMID: [26184493](https://pubmed.ncbi.nlm.nih.gov/26184493/).
58. Zumla A, Rao M, Wallis RS, Kaufmann SH, Rustonjee R, Mwaba P, et al. Host-directed therapies for infectious diseases: current status, recent progress, and future prospects. *Lancet Infect Dis*. 2016; 16(4):e47–63. PMID: [27036359](https://pubmed.ncbi.nlm.nih.gov/27036359/). doi: [10.1016/S1473-3099\(16\)00078-5](https://doi.org/10.1016/S1473-3099(16)00078-5)

59. Click ES, Moonan PK, Winston CA, Cowan LS, Oeltmann JE. Relationship between *Mycobacterium tuberculosis* phylogenetic lineage and clinical site of tuberculosis. *Clin Infect Dis*. 2012; 54(2):211–9. PMID: [22198989](#). doi: [10.1093/cid/cir788](#)
60. Gillespie SH, Crook AM, McHugh TD, Mendel CM, Meredith SK, Murray SR, et al. Four-month moxifloxacin-based regimens for drug-sensitive tuberculosis. *N Engl J Med*. 2014; 371(17):1577–87. PMID: [25196020](#). doi: [10.1056/NEJMoa1407426](#)
