# Supplementary material for: Host Immune Responses Differ between M. africanum- and M. tuberculosis-Infected Patients following Standard Anti-tuberculosis Treatment
Source: PLoS Negl Trop Dis. 2016 May 18;10(5):e0004701. doi: 10.1371/journal.pntd.0004701 (PMC4871581; doi:10.1371/journal.pntd.0004701)
Supplement: S3 Table — Show the Estimated Difference (ED) of genes expression in blood incubated with Medium only and the Estimated Incremental Difference (EID) of genes expression above the baseline induced by the respective stimulants between Mtb and Maf-infected patients before treatment. The statistical analyses were done using a random intercept model based on restricted maximum likelihood (REML) and adjusted for age, gender and ethnicity as well as applying Sidak multiple comparison correction. Statistical significant ED and EID are highlighted in bold. (XLSX) [file pntd.0004701.s004.xlsx]

## Sheet: Month 0 of  Anti-TB treatment
S3. Table: Estimated Difference (ED) and Estimated Incremental Difference (EID) in genes expression between Mtb and Maf-infected patients by stimulants, adjusted for age, gender and ethnicity before anti-TB treatment
	Stimulant				P#
	Medium	EC	Live Maf	Live Mtb
Genes	ED (95%CI)	EID (95%CI)	EID (95%CI)	EID (95%CI)
IFNG	0.05 (-0.30;0.39)	0.12 (-0.20;0.44)	-0.01 (-0.33;0.31)	0.18 (-0.13;0.50)	0.48
BPI	0.12 (-0.23;0.46)	-0.45 (-0.77;-0.13)**	-0.32 (-0.64;-0.002)	-0.20 (-0.52;0.12)	0.31
AIRE	-0.4 (-0.38;0.31)	0.05 (-0.27;0.37)	0.09 (-0.41;0.22)	0.13 (-0.19;0.44)	0.38
TNF	-0.01 (-0.35;0.34)	-0.14 (-0.46;0.17)	0.13 (-0.19;0.45)	-0.04 (-0.36;0.28)	0.24
CXCL10	-0.12 (-0.47;0.22)	0.15 (-0.16;0.47)	-0.12 (-0.44;0.20)	0.23 (-0.09;0.55)	0.08
CD4	-0.05 (-0.39;0.29)	-0.06 (-0.38;0.26)	-0.10 (-0.42;0.21)	0.11 (-0.20;0.43)	0.37
TGFB1	-0.11 (-0.23;0.45)	-0.10 (-0.42;0.21)	-0.18 (-0.49;0.14)	0.24 (-0.08;0.55)	0.025
IL13	-0.37 (-0.71;-0.03)**	0.01 (-0.31;0.33)	0.06 (-0.25;0.38)	0.28 (-0.04;0.60)	0.21
IL1B	0.11 (-0.23;0.45)	0.24 (-0.07;0.56)	-0.05 (-0.37;0.26)	0.18 (-0.13;0.50)	0.15
IL6	-0.07 (-0.42;0.27)	-0.19 (-0.50;0.13)	-0.03 (-0.35;0.28)	0.13 (-0.19;0.45)	0.14
IL2	-0.14 (-0.48;0.21)	-0.04 (-0.36;0.27)	-0.02 (-0.34;0.30)	0.21 (-0.10;0.53)	0.21
IL5	-0.02 (-0.37;0.32)	0.03 (-0.29;0.35)	0.06 (-0.25;0.38)	0.04 (-0.28;0.36)	0.97
GZMA	-0.06 (-0.41;0.28)	-0.14 (-0.46;0.18)	0.03 (-0.28;0.35)	0.21 (-0.11;0.53)	0.09
GNLY	-0.01 (-0.35;0.33)	0.01 (-0.31;0.32)	0.06 (-0.25;0.38)	0.11 (-0.20;0.43)	0.81
GZMB	-0.11 (-0.46;0.23)	0.01 (-0.31;0.33)	-0.09 (-0.40;0.23)	0.11 (-0.21;0.42)	0.49
IL7R	-0.15 (-0.50; 0.19)	-0.04 (-0.36;0.27)	-0.09 (-0.40;0.23)	0.15 (-0.117;0.47)	0.3
PRF1	-0.13 (-0.47;0.21)	0.05 (-0.27;0.37)	-0.03 (-0.35;0.29)	0.28 (-0.04;0.59)	0.14
LAG3	0.09 (-0.24;0.42)	-0.7 (-0.48;0.15)	-0.05 (-0.36;0.27)	0.01 (-0.31;0.33)	0.53
CCR7	-0.17 (-0.51;0.18)	0.03 (-0.29;0.35)	0.11 (-0.20;0.43)	0.18 (-0.14;0.50)	0.65
IL17A	-0.21 (-0.56;0.13)	0.01 (-0.32;0.32)	0.05 (-0.26;0.37)	0.09 (-0.23;0.41)	0.86
TBX21	-0.17 (-0.52;0.17)	0.01 (-0.30;0.33)	0.23 (-0.09;0.54)	0.25 (-0.07;0.56)	0.28
TNFRSF18	0.25 (-0.09;0.59)	-0.24 (-0.56;0.08)	-0.23 (-0.55;0.08)	-0.02 (-0.34;0.29)	0.31
IL22RA1	-0.06 (-0.4;0.28)	-0.01 (-0.33;0.31)	-0.09 (-0.40;0.23)	0.09 (-0.23;0.41)	0.56
PTPRCV2	0.16 (-0.19;0.50)	-0.16 (-0.48;0.16)	-0.19 (-0.51;0.13)	0.02 (-0.29;0.34)	0.36
CCL4	0.03 (-0.31;0.37)	0.28 (-0.04;0.60)	0.02 (-0.30;0.33)	0.31 (-0.01;0.63)	0.13
IL9	0.11 (-0.24;0.45)	-0.06 (-0.37;0.26)	-0.14 (-0.46;0.17)	0.01 (-0.31;0.33)	0.63
CD3E	0.10 (-0.24;0.44)	-0.01 (-0.32;0.31)	-0.13 (-0.45;0.19)	-0.04 (-0.35;0.28)	0.74
TLR9	-0.16 (-0.51;0.18)	0.05 (-0.26;0.37)	0.09 (-0.23;0.41)	0.17 (-0.15;0.49)	0.76
CD209	-0.11 (-0.46;0.23)	0.07 (-0.25;0.38)	-0.06 (-0.38;0.25)	0.04 (-0.28;0.36)	0.7
IL10	-0.23 (-0.57;0.12)	-0.08 (-0.40;0.24)	0.04 (-0.27;0.36)	0.29 (-0.02;0.61)	0.07
NLRP1	-0.03 (-0.38;0.31)	0.09 (-0.23;0.41)	-0.11 (-0.43;0.21)	0.16 (-0.16;0.48)	0.23
CXCL13	0.10 (-0.24;0.44)	-0.05 (-0.37;0.27)	-0.32 (-0.64;-0.01)	-0.02 (-0.34;0.29)	0.13
IL12A	-0.30 (-0.64;0.04)*	-0.3 (-0.60;0.03)*	-0.17 (-0.49;0.14)	0.06 (-0.26;0.38)	0.09
TLR6	0.11 (-0.24;0.45)	-0.01 (-0.32;0.31)	-0.04 (-0.36;0.28)	-0.02 (-0.34;0.30)	0.98
TLR3	0.02 (-0.32;0.36)	-0.19 (-0.51;0.12)	-0.06 (-0.38;0.25)	-0.06 (-0.38;0.26)	0.64
CCL5	-0.25 (-0.60;0.10)	-0.01 (-0.32;0.32)	0.04 (-0.27;0.36)	0.25 (-0.07;0.57)	0.25
TLR7	-0.14 (-0.49;0.20)	-0.06 (-0.38;0.26)	-0.15 (-0.47;0.16)	0.10 (-0.22;0.41)	0.3
CCL22	-0.06 (-0.40;0.28)	-0.12 (-0.43;0.20)	-0.26 (-0.58;0.05)	0.07 (-0.24;0.39)	0.11
CCL2	-0.03 (-0.38;0.31)	-0.05 (-0.36;0.27)	-0.14 (-0.46;0.18)	0.07 (-0.24;0.39)	0.42
NLRP2	-0.11 (-0.45;0.23)	-0.07 (-0.39;0.24)	-0.16 (-0.48;0.16)	0.06 (-0.25;0.38)	0.37
TAGAP	0.11 (-0.23;0.45)	0.01 (-0.31;0.32)	0.02 (-0.30;0.34)	0.15 (-0.17;0.47)	0.61
NLRC4	-0.14 (-0.49;0.20)	-0.23 (-0.34;0.29)	0.19 (-0.13;0.51)	0.24 (-0.07;0.56)	0.22
IL23A	-0.03 (-0.37;0.31)	-0.19 (-0.51;0.13)	0.19 (-0.13;0.51)	0.23 (-0.08;0.55)	0.017
TLR8	-0.15 (-0.49;0.20)	-0.06 (-0.38;0.25)	-0.10 (-0.42;0.22)	0.18 (-0.14;0.50)	0.18
IL12B	-0.17 (-0.52;0.17)	-0.03 (-0.35;0.29)	-0.05 (-0.37;0.27)	0.12 (-0.19;0.44)	0.5
NLRP4	-0.05 (-0.40;0.29)	0.04 (-0.27;0.36)	-0.06 (-0.38; 0.25)	0.10 (-0.22;0.42)	0.59
TLR2	0.18 (-0.16;0.53)	-0.23 (-0.54;0.09)	-0.14 (-0.46;0.18)	0.09 (-0.23;0.41)	0.13
ZNF331	0.14 (-0.20;0.48)	0.09 (-0.23;0.41)	0.19 (-0.13;0.51)	0.19 (-0.12;0.51)	0.77
MRC1	-0.14 (-048;0.20)	0.05 (-0.27;0.36)	0.06 (-0.26;0.37)	0.08 (-0.23;0.40)	0.97
MRC2	-0.06 (-0.4;0.29)	-0.14 (-0.46;0.17)	-0.27 (-0.59;0.05)	0.06 (-0.26;0.38)	0.12
NOD2	-0.01 (-0.36;0.33)	-0.17 (-0.49;0.14)	0.09 (-0.23;0.41)	0.09 (-0.22;0.41)	0.16
TLR4	-0.14 (-0.49;0.20)	0.20 (-0.12;0.51)	0.18(-0.14;0.50)	0.33 (0.01;0.65)	0.59
CLEC7A	0.03 (-0.32;0.37)	-0.10 (-0.42;0.21)	-0.03 (-0.35;0.29)	0.19 (-0.12;0.51)	0.17
AREG	0.09 (-0.26;0.43)	-0.29 (-0.61;0.03)	-0.16 (-0.47;0.16)	0.04 (-0.28;0.36)	0.13
TLR1A	-0.07 (-0.41;0.27)	-0.01 (-0.33;0.30)	0.02 (-0.30;0.34)	0.22 (-0.09;0.54)	0.29
#: Wald test assessing whether there is evidence of significant differences in the incremental MTBC lineage effect on the corresponding genes expression between stimulants.
*: Statistically significant at p<0.1.
**: Statistically significant at p<0.05.
***: Statistically significant at p<0.01.
ED: Estimated Difference of genes expression between Mtb vs Maf-infected patients in blood incubated with medium alone.
EID: Estimated Incremental Difference of genes expression induced by the respective stimulants between Mtb vs Maf-infected patients.
Number highlighted in bold showed statistical significant differences.
